# The Extra-Islet Pancreas Supports Autoimmunity in Human Type 1 Diabetes

Barlow, G.L.<sup>1,2</sup>, Schürch, C.M.<sup>2,4</sup>, Bhate, S.S.<sup>2</sup>, Phillips, D.<sup>2</sup>, Young, A.<sup>3,6,7</sup>, Dong, S.<sup>3,5</sup> Martinez, HA.<sup>1</sup>, Kaber, G.<sup>1</sup>, Nagy, N.<sup>1</sup>, Ramachandran S.<sup>1</sup>, Meng, J.<sup>1</sup>, Korpos E.<sup>9</sup> Bluestone, J.A.<sup>†,8</sup>, Nolan, G.P.<sup>†,2</sup>, Bollyky, P.L.<sup>†,‡,1</sup>

† Corresponding Author

‡ Lead Contact

## Affiliations:

1. Division of Infectious Diseases and Geographic Medicine, Department of Medicine, Stanford University School of Medicine, Stanford, CA 94305, USA
2. Department of Pathology, Stanford University School of Medicine, Stanford, CA 94305, USA
3. Diabetes Center, University of California San Francisco, San Francisco, CA 94143, USA
4. Department of Pathology and Neuropathology, University Hospital and Comprehensive Cancer Center, Tübingen, Germany
5. Sean N. Parker Autoimmune Research Laboratory and Diabetes Center, University of California San Francisco, San Francisco, CA, USA
6. Huntsman Cancer Institute, University of Utah Health Sciences Center, Salt Lake City, UT 84112, USA
7. Department of Pathology, University of Utah School of Medicine, Salt Lake City, UT 84112, USA
8. Sonoma Biotherapeutics, South San Francisco, CA 94080 USA
9. Institute of Physiological Chemistry and Pathobiochemistry and Cells-in-Motion Interfaculty Center, University of Muenster, Germany

Further information and requests for resources and reagents should be directed to and will be fulfilled by the lead contact, Paul Bollyky ([pbollyky@stanford.edu](mailto:pbollyky@stanford.edu)).

## 36 **Abstract**

37 In autoimmune Type 1 diabetes (T1D), immune cells progressively infiltrate and destroy the islets  
38 of Langerhans – islands of endocrine tissue dispersed throughout the pancreas. However, it is  
39 unclear how this process, called ‘insulinitis’, develops and progresses within this organ. Here, using  
40 highly multiplexed CO-Detection by indEXing (CODEX) tissue imaging and cadaveric pancreas  
41 samples from pre-T1D, T1D, and non-T1D donors, we examine pseudotemporal-spatial patterns  
42 of insulinitis and exocrine inflammation within large pancreatic tissue sections. We identify four  
43 sub-states of insulinitis characterized by CD8<sup>+</sup>T cells at different stages of activation. We further  
44 find that exocrine compartments of pancreatic lobules affected by insulinitis have distinct  
45 cellularity, suggesting that extra-islet factors may make particular lobules permissive to disease.  
46 Finally, we identify “staging areas” - immature tertiary lymphoid structures away from islets  
47 where CD8<sup>+</sup>T cells appear to assemble before they navigate to islets. Together, these data  
48 implicate the extra-islet pancreas in autoimmune insulinitis, greatly expanding the boundaries of  
49 T1D pathogenesis.

50

51

52

53 **Keywords:** Type 1 Diabetes; Insulinitis; Autoimmunity; Multiplexed Imaging; CODEX; Systems  
54 Immunology; Tissue Architecture

## 55 Main

56 In Type 1 diabetes (T1D), autoimmune insulinitis drives the progressive destruction of insulin-  
57 producing  $\beta$ -cells, resulting in a critical requirement for exogenous insulin. T1D affects over 8  
58 million individuals world-wide with an estimated half-a-million new diagnoses each year (Gregory  
59 et al. 2022).

60 Recently, the first immunotherapy for delaying T1D onset teplizumab (a human anti-CD3  
61 monoclonal antibody) was approved by the US Food and Drug Administration (FDA) (Hirsch  
62 2023). However, this treatment and other immunotherapies only benefit some patients for  
63 reasons that are unclear (Herold et al. 2013; Perdigo et al. 2019; Herold et al. 2019; Pescovitz  
64 et al. 2009; Orban et al. 2011; 2014; Bluestone, Buckner, and Herold 2021). A better  
65 understanding of T1D pathogenesis is essential to building on this success.

66 T1D pathogenesis encompasses immune infiltration of the islets, also known as ‘insulinitis’, and  
67 inflammation of the non-islet pancreas. Insulinitis has been extensively investigated and the major  
68 cell types associated with  $\beta$ -cell killing have been identified; however, any understanding of how  
69 the inflammation in non-islet pancreas contributes to insulinitis is lacking.

70 One of the challenges of studying human T1D pathology is the availability of suitable tissue  
71 samples. Obtaining pancreatic biopsies raises the risk of surgical complications and the  
72 progressive nature of T1D would necessitate serial, longitudinal studies over time, which is  
73 prohibitive (Krogvold et al. 2014). Fortunately, the Juvenile Diabetes Research Foundation (JDRF)  
74 Network for Pancreatic Organ Donors with Diabetes (nPOD) have provided human pancreatic  
75 tissues from cadaveric donors for this study (Campbell-Thompson et al. 2012; Pugliese et al.  
76 2014). nPOD has enabled substantial progress towards characterizing the cell types comprising  
77 insulinitis and extra-islet inflammation (Wilcox et al. 2016; Arif et al. 2014; Leete et al. 2016;  
78 Martino et al. 2015).

79 The development of highly multiplexed tissue imaging technologies has empowered these  
80 efforts. Recently, Imaging Mass Cytometry (IMC) was used to uncover changes in T1D islets,  
81 including alterations in  $\beta$ -cell phenotypes, immune composition, vascular density, and basement  
82 membrane (Damond et al. 2019; Wang et al. 2019).

83 Despite these advances, our understanding of certain key features of human T1D pathology  
84 remains limited. In particular, insulinitis is regulated by checkpoints that ultimately fail in T1D.  
85 However, a comprehensive and quantitative search for insulinitis checkpoints has not been  
86 performed to date. Furthermore, islets in different regions of the pancreas are infiltrated at  
87 strikingly different rates for reasons that are unclear. Several lines of evidence suggest that the  
88 non-islet pancreatic tissue could be responsible by governing the targeting of islets: First, peri-  
89 insulinitis, which is the accumulation of immune cells outside the islet, is observed in tissues from  
90 patients with T1D (Korpos et al. 2013), indicating that not all T cells extravasate directly into islets  
91 (Savinov et al. 2003). Second, the composition and functionality of immune and epithelial cells  
92 outside islets differ in T1D patients compared to non-diabetic controls (Rodriguez-Calvo et al.  
93 2014; Bender et al. 2020; Campbell-Thompson et al. 2012; Campbell-Thompson, Rodriguez-  
94 Calvo, and Battaglia 2015; Fasolino et al. 2022). Finally, tertiary lymphoid structures (TLS), which  
95 are dense aggregates of lymphoid cells indicative of local immune activation, are observed

96 outside islets in T1D patients (Korpos et al. 2021). To date, multiplexed imaging studies have only  
97 examined islets. A comprehensive, spatially resolved cellular analysis of whole pancreatic tissue  
98 in T1D is lacking.

99 Here, we investigated both islet and non-islet pancreatic tissue in the progression of T1D. We  
100 applied the highly multiplexed tissue imaging platform CO-Detection by indexing (CODEX) with  
101 an antibody panel targeting 54 antigens to samples from a cohort of T1D patients with insulinitis  
102 as well as non-T1D individuals with and without autoantibodies obtained through the JDRF nPOD  
103 program. We analyzed approximately 2000 islets and broad swaths of surrounding tissue to  
104 evaluate local and distal spatial architecture. We then used pseudotime analysis to characterize  
105 insulinitis sub-states based on the activation states of islet-infiltrating CD8<sup>+</sup>T cells. We further  
106 investigated the cellular changes in niches and lobules beyond islets. Our results implicate both  
107 the local islet microenvironment and inflammation at distal sites within the pancreas in insulinitis  
108 progression, greatly expanding the boundaries of pathologic inflammation in T1D.

## 109 **Cohort curation, image acquisition, and cell annotation**

110 The JDRF nPOD is a national registry of cadaveric pancreases donated by T1D patients that has  
111 transformed the ability to investigate the pathways underlying the development and progression  
112 of human T1D (Campbell-Thompson et al. 2012; Pugliese et al. 2014). At the time of our study,  
113 17 cases with insulinitis were available from nPOD, from which we selected 10 that had visible  
114 insulinitis in preliminary IHC analyses. The final cohort included two autoantibody-positive, pre-  
115 T1D cases, eight T1D cases, and three non-diabetic controls. Cases were selected by surveying  
116 the nPOD online immunohistochemistry database which contains images of tissue sections triple-  
117 stained for Insulin, Glucagon, and CD3. T1D and pre-T1D cases that had CD3<sup>+</sup> staining in islet or  
118 peri-islet spaces and tissue still available were selected for our study. The cases varied in the time  
119 between diagnosis and death from 0 years (diagnosed at death) to 6 years (Figure 1.A, left). The  
120 causes of death were mostly unrelated to T1D complications (Methods). Therefore, the time  
121 since diagnosis is not a reflection of the severity or aggressiveness of the individual's disease.

122 Large regions averaging 55 mm<sup>2</sup> were imaged with CODEX as previously described (Schürch et al.  
123 2020; Phillips, Matusiak, et al. 2021; Hickey et al. 2021). Regions were imaged to capture islets  
124 and the surrounding region simultaneously (Figure 1.A, center and right). The algorithm CellSeg  
125 was used to segment cell nuclei and quantify marker expression from CODEX images as  
126 previously described (Lee et al. 2022). Between 3.0x10<sup>5</sup> and 9.8x10<sup>5</sup> cells per donor were  
127 obtained resulting in 7.0x10<sup>6</sup> cells in total. Twenty-one cell types were identified with Leiden  
128 clustering and manual merging and visualized using Uniform Manifold Approximation and  
129 Projection (UMAP) (Figure 1.B). Endocrine cells were manually gated from UMAP embeddings  
130 derived from Proinsulin, Glucagon, and Somatostatin to identify  $\beta$ -cells,  $\alpha$ -cells, and  $\delta$ -cells.  
131 Immune cells were sub-clustered with the Leiden algorithm using immune-specific markers  
132 (Figure 1.C, Supplemental Table 2). A heatmap of all cell types and their marker expression is  
133 displayed in Figure 1.D. Of note, we could not accurately identify macrophage subsets or  
134 distinguish dendritic cells from macrophages due to panel design, complex combinations of co-  
135 expression, and the difficulty in segmenting and quantifying markers on myeloid populations.  
136 Therefore, dendritic cells are contained within the 'macrophage' group for all analyses. In

137 addition, we identified a cell population that could not be definitively annotated, expressing high  
138 levels of CD45, CD69, Granzyme-B, and CD44, intermediate levels of CD16, S100A6, Galectin-3,  
139 and Hyaluronan, but not expressing lineage markers CD3, CD20, CD56, CD57, CD15, or MPO. We  
140 confirmed from the raw images that CD3, CD4, and CD8 were not internalized, indicating  
141 activation, nor did these cells express other T cell activation markers CD45RA, CD45RO, PD-1, or  
142 LAG-3. This population could represent a type of innate lymphoid cell or mast cells (Dalmás et al.  
143 2017; Martino et al. 2015) and was labeled Granzyme-B<sup>+</sup>/CD3<sup>-</sup> (Figure 1.D).

## 144 **Islet- and non-islet regions are altered in T1D**

145 We first sought to identify cellular changes in T1D within islets specifically. Previous reports  
146 observed that insulin-containing islets are significantly more common in recent-onset T1D cases  
147 than cases with diabetes durations of greater than one year (In't Veld 2011). Similarly, we found  
148 that samples from patients who had been diagnosed with T1D for 0-2 years had significantly  
149 reduced  $\beta$ -cell frequencies compared to non-diabetic controls. Lastly, samples from subjects with  
150 disease durations of 5-6 years had minimal remaining  $\beta$ -cell mass (Figure 1.E). Whereas one Pre-  
151 T1D case had  $\beta$ -cell mass comparable to those of cases with disease duration of 0-2 years, the  
152 other Pre-T1D case was comparable to non-diabetic controls (Figure 1.E).

153 Next, we investigated how the abundances of non-endocrine cell types inside islets differed  
154 across donors. We performed Principal Component Analysis (PCA) of the frequencies of non-  
155 endocrine cell types located in islets in each donor. Donors were clearly separated into two  
156 groups by the first two principal components; one group included all T1D cases and one pre-T1D  
157 case and the second group included all non-diabetic cases and the other pre-T1D case (Figure  
158 1.F). In this analysis, we did not consider  $\beta$ -cells,  $\alpha$ -cells, and  $\delta$ -cells. Thus, donors were stratified  
159 by disease duration strictly according to the abundances of immune and other pancreatic, non-  
160 endocrine cell types in the islets.

161 We next considered only cells located outside islets. Again, donors were clearly separable by the  
162 first two principal components (Figure 1.G). The first principal component separated cases with  
163 times since diagnosis between 0-2 years from non-T1D, pre-T1D, and cases with diabetes  
164 durations of 5-6 years (Figure 1.G). The second principal component separated cases with  
165 diabetes durations of 5-6 years from the rest (Figure 1.G). Therefore, both the islet and non-islet  
166 spaces of T1D and non-T1D cases were distinct.

167 Many cell types were increased in T1D cases with times since diagnosis of 0-2 years relative to  
168 non-diabetic controls. In T1D cases with times since diagnosis of 5-6 years, the abundance of  
169 different cell types either remained higher than healthy controls or returned to baseline  
170 (Supplemental Figure 1). This trend was present in both islet and non-islet regions. These data  
171 demonstrate that the immune activity between the islet and extra-islet compartments are  
172 coordinated but the cellular programs underlying this crosstalk are unclear.

## 173 **Pseudotemporal reconstruction of islet pathogenesis** 174 **identifies a conserved trajectory of insulinitis**

175 In human T1D,  $\beta$ -cell destruction does not occur simultaneously in all pancreatic islets in an  
176 individual and even neighboring islets can be at different stages of destruction (In't Veld 2011;  
177 Damond et al. 2019). We therefore used pseudotime analysis to infer the most likely progression  
178 of a single islet through disease space (Damond et al. 2019). To develop a pseudotemporal map  
179 of the islets in our study, we quantified the cellular composition of each islet, including cells  
180 within 20  $\mu\text{m}$  of the islet's boundary, and applied the pseudotime algorithm PArtition-based  
181 Graph Abstraction (PAGA) (Figure 2.A; Figure 2.B), (Wolf et al. 2019). PAGA was selected because  
182 it is a high-performing algorithm able to identify multiple trajectories, if they exist, while making  
183 minimal assumptions about the true structure (Saelens et al. 2019).

184 Displayed in Figure 2.B is the PAGA force-directed layout where each point represents an islet.  
185 Each islet's color corresponds to its pseudotemporal distance from the centroid of non-diabetic  
186 islets. As expected, the different donor groups (no T1D, pre-T1D, T1D) had different distributions  
187 of islets across the PAGA map (Figure 2.C ). In the PAGA map, a continuum is apparent from islets  
188 abundant in insulin-expressing  $\beta$ -cells on the left of the map to islets depleted in  $\beta$ -cells on the  
189 right of the map (Figure 2.D, Figure 2.E, Figure 2.F, top row). PAGA uses Leiden clustering  
190 internally, enabling the following regions of the pseudotime map to be labelled objectively  
191 (Supplemental Figure 2.A): 1) Islets with low pseudotime values on the left of the map were  
192 labelled 'Healthy' even if they originated from T1D donors. 2) Islets in the middle of the map were  
193 elevated in HLA-ABC (MHC Class I) expression, CD8<sup>+</sup>T cells, and macrophages (Figure 2.D, Figure  
194 2.E, Figure 2.F, rows 2-4) and were labelled 'Inflamed'. 3) Islets with late pseudotime values on  
195 the right of the map were devoid of  $\beta$ -cells and were labelled ' $\beta$ -Cell Depleted' (Figure 2.D, Figure  
196 2.E, Figure 2.F, top row). In addition, islets lacking  $\beta$ -cells occasionally contained CD8<sup>+</sup>T cells and  
197 were labelled ' $\beta$ -Cell Depleted + Immune Islets' (Figure 2.D, Figure 2.E, Figure 2.F, rows 2-4). The  
198 presence of these islets suggests that the signals retaining CD8<sup>+</sup>T cells in the islets linger after  $\beta$ -  
199 cell death.

200 Islets from non-diabetic controls and one of the pre-T1D donors (6314) were primarily in the  
201 Healthy group to the left of the map (Figure 2.C ). Islets from subjects who had had T1D for of 5-  
202 6 years (cases 6195 and 6323) were primarily in the  $\beta$ -Cell Depleted group to the right of the map  
203 (Figure 2.C ). All the remaining T1D donors and the other pre-T1D donor were distributed broadly  
204 throughout the map (Figure 2.C ).

205 Together, these results illustrate a single, non-branching progression from Healthy Islets to  $\beta$ -cell  
206 depleted Islets via Inflamed Islets, consistent with previous pseudotime analyses (Damond et al.  
207 2019).



## 208 **IDO expression on islet vasculature is linked to T cell** 209 **infiltration and $\beta$ -cell death during insulinitis**

210 While inspecting images of islets, we occasionally observed islets with vasculature that stained  
211 positive for indoleamine 2, 3-dioxygenase 1 (IDO). In the tumor microenvironment, IDO is  
212 expressed by myeloid cells and suppresses CD8<sup>+</sup>T cell activity through multiple mechanisms  
213 including induction of FOXP3<sup>+</sup> regulatory T cells and inhibition of CD8<sup>+</sup>T cell proliferation (Munn  
214 and Mellor 2016). In islets, IDO was expressed by CD31<sup>+</sup> vasculature and not CD45<sup>+</sup> immune cells  
215 adjacent to vasculature (Figure 2.G). IDO was not expressed by other cell types in islets or by  
216 vascular cells outside islets (Supplemental Figure 2.B). We manually quantified vascular  
217 expression of IDO on islets throughout pseudotime and found that all but two IDO<sup>+</sup> islets were in  
218 the Inflamed group (Figure 2.H). Therefore, IDO expression by islet vasculature was tightly  
219 associated with inflammation.

220 We hypothesized that IDO expression was induced by infiltrating immune cells during insulinitis. A  
221 major inducer of IDO expression is interferon- $\gamma$ , a cytokine highly expressed by T cells and  
222 macrophages (Munn and Mellor 2016). We compared the frequency of CD8<sup>+</sup>T cells and  
223 macrophages in islets from the Inflamed group with and without IDO<sup>+</sup> vasculature and found that  
224 CD8<sup>+</sup>T cells were significantly more abundant in islets with IDO<sup>+</sup> vasculature than islets without  
225 IDO<sup>+</sup> vasculature (Figure 2.I). The abundance of macrophages was not significantly different in  
226 the islets with and without IDO<sup>+</sup> vasculature (Supplemental Figure 2.C). This implies that during  
227 CD8<sup>+</sup>T cell infiltration, IDO is induced on vasculature to subdue the inflammation.

228 Due to IDO's immunosuppressive role in the tumor microenvironment (Munn and Mellor 2016),  
229 IDO may protect  $\beta$ -cells from inflammation. If so, for  $\beta$ -cells to be eliminated, IDO-mediated  
230 suppression would need to be circumvented through its inhibition or a reduction in IDO's  
231 expression. We observed that only 3.3% of islets in the  $\beta$ -Cell Depleted + Immune group had IDO<sup>+</sup>  
232 vasculature, whereas 23.9% of islets in the Inflamed group had IDO<sup>+</sup> vasculature ( $p = .017$  chi-  
233 square test) (Figure 2.H). This is consistent with the hypothesis that IDO expression is suppressed  
234 prior to  $\beta$ -cell loss.

235 In summary, IDO expression by islet vasculature is associated with T cell infiltration and its loss  
236 during insulinitis is associated with  $\beta$ -cell depletion. Together, these suggest that IDO<sup>+</sup> vasculature  
237 is an immune regulatory checkpoint that fails in T1D.

## 238 **Insulinitis has sub-states, defined by functional states of** 239 **CD8<sup>+</sup>T cells**

240 Insulinitis is regulated by checkpoints that fail to control inflammation in T1D. For example, the  
241 islet capsule restricts CD8<sup>+</sup>T cells from entering islets (Korpos et al. 2013) and PD-L1 on  $\beta$ -cells  
242 suppresses infiltrating CD8<sup>+</sup>T cells (Osum et al. 2018). By definition, a checkpoint prevents an islet  
243 from progressing and thus can halt islets in an insulinitis 'sub-state'. Cell differentiation studies  
244 have demonstrated the utility of using high-parameter data to infer checkpoints from their  
245 corresponding sub-states (Satpathy et al. 2019). We reasoned that we could identify

246 immunoregulatory checkpoints in T1D by identifying sub-states of insulinitis. To identify insulinitis  
247 sub-states, we began by characterizing the functional states of CD8<sup>+</sup>T cells in islets. Although,  
248 quantifying the expression of functional markers from tissue images can be challenging due to  
249 autofluorescence, non-specific antibody staining, and signal spillover between adjacent cells, we  
250 overcame these by training a neural network to detect marker expression of single cells from raw  
251 cell-images (Figure 3.A, Supplemental Figure 3.A). Using our neural network, we quantified the  
252 expression of T cell markers on islet CD8<sup>+</sup>T cells (Figure 3.B).

253 Overall, markers of antigen experience (PD-1, TOX, CD45RO, CD69, CD44) were the most  
254 commonly expressed on islet-infiltrating CD8<sup>+</sup>T cells (Supplemental Figure 3.B). CD8<sup>+</sup>T cells  
255 expressing CD45RA (which are either naïve or terminally differentiated effector memory cells)  
256 were detectable in islets, as previously reported (Damond et al. 2019) (Figure 3.B). PD-1 and TOX  
257 were commonly co-expressed on CD45RO<sup>+</sup> CD8<sup>+</sup>T cells detected in islets (Figure 3.B). We also  
258 observed expression of CD69 on CD45RO<sup>+</sup> CD8<sup>+</sup>T cells, which are likely tissue-resident memory  
259 cells (Kuric et al. 2017). CD69 was co-expressed with CD45RA<sup>+</sup> CD8<sup>+</sup>T cells indicating that naïve T  
260 cells are being activated in islets. In addition, we observed a rare population of CD45RO<sup>+</sup> CD8<sup>+</sup>T  
261 cells that co-expressed multiple functional markers including CD69, CD44, LAG-3, Granzyme-B,  
262 and ICOS (Figure 3.B bottom clade). Lastly, a rare population of CD57<sup>+</sup> CD8<sup>+</sup>T cells was present  
263 but these cells rarely co-expressed LAG-3, Granzyme-B, or ICOS (Figure 3.B top clade). These  
264 populations bear a resemblance to the two exhausted T cell populations identified in the  
265 peripheral blood of T1D patients that were associated with responsiveness to alefacept (Diggins  
266 et al. 2021). The heterogeneous functional states of CD8<sup>+</sup>T cells in islets demonstrate varying  
267 stages of activation, suggesting that they receive additional stimulation after reaching islets.

268 We expected that insulinitis sub-states would be characterized by specific combinations of CD8<sup>+</sup>T  
269 cell states found in islets together. To interrogate this, we performed UMAP only on Inflamed  
270 islets, using the frequencies of CD8<sup>+</sup>T cells expressing each functional marker. Leiden clustering  
271 identified four inflamed sub-clusters, I-IV, (Figure 3.C top). Here, the term “sub-cluster” is used  
272 to highlight that these groups were all contained within the previously defined “Inflamed” cluster  
273 and the roman numerals are expressly not intended to imply a temporal ordering. Inflamed-I  
274 contained only CD8<sup>+</sup>T cells that did not express any of the functional markers analyzed (Figure  
275 3.C bottom, top row). Inflamed-II was characterized by a high frequency of CD45RA<sup>+</sup>CD8<sup>+</sup>T cells  
276 (Figure 3.C bottom, second row from top and Figure 3.D top row). Inflamed-III was characterized  
277 by a low frequency of CD45RA<sup>+</sup> cells and high frequency of CD45RO<sup>+</sup> and PD-1<sup>+</sup> cells that did not  
278 co-express any functional markers (Figure 3.C bottom, third row from top and Figure 3.D middle  
279 row). Inflamed-IV was characterized by an enrichment of CD8<sup>+</sup>T cells expressing CD57 or LAG-3,  
280 ICOS, and Granzyme-B in addition to PD-1 and CD45RO Inflamed-III (Figure 3.C bottom, bottom  
281 row and Figure 3.D bottom row). In summary, the diversity of CD8<sup>+</sup>T cells in any particular islet is  
282 much more restricted than the diversity of total islet CD8<sup>+</sup>T cell states.

283 The fact that the inflamed sub-clusters are characterized by CD8<sup>+</sup>T cells at different stages of  
284 activation suggests that the inflamed sub-clusters represent different stages of a progression  
285 rather than distinct trajectories (either within or across patients). In support of this, each  
286 individual donor possessed islets that belonged to more than one inflamed islet sub-cluster  
287 (Figure 3.E). Therefore, Inflamed-I through Inflamed-IV do not represent patient subtypes but  
288 insulinitis sub-states conserved among T1D patients.



## 289 **Regulation of insulitis sub-states by the islet** 290 **microenvironment**

291 To identify cellular or molecular factors that regulate the state of CD8<sup>+</sup>T cells in islets, we first  
292 asked if CD8<sup>+</sup>T cell states are enriched in islets or extend into the peri-islet and exocrine space.  
293 To this end, we computed the frequencies of each CD8<sup>+</sup>T cell state inside the islet and in separate  
294 swaths of 0-25 $\mu$ m, 25-50 $\mu$ m and 50-100 $\mu$ m away from the islets (Supplemental Figure 3.C). We  
295 found that for islets of Inflamed-II, -III, and -IV, functional markers characterizing the CD8<sup>+</sup>T cells  
296 were expressed more frequently inside islets than in the surrounding tissue areas. This  
297 demonstrated that differences in the compositions of CD8<sup>+</sup>T cell states in different islets were  
298 due to the islet microenvironment and not the surrounding exocrine spaces.

299 Although macrophages are abundant in islets from the Inflamed group (Figure 2.E, Figure 2.F) and  
300 are capable of interacting with T cells through antigen presentation and cytokine secretion,  
301 neither the expression of markers of macrophage activity nor macrophage abundance was  
302 significantly associated with islets from inflamed sub-clusters (Supplemental Figure 3.D).  
303 Similarly, no other cell-type nor the vascular expression of IDO was linked to CD8<sup>+</sup>T cell programs  
304 in islets (Supplemental Figure 3.D). These negative data suggest that transitions between insulitis  
305 states are independent of changes in the abundance of any of the cell types identified in our  
306 tissues. Consistent with this, the four inflamed sub-clusters had identical distributions  
307 throughout the original PAGA force-directed layout (Figure 3.F). These data suggest that insulitis  
308 sub-states are transient over the course of insulitis and the CD8<sup>+</sup>T cell states are being regulated  
309 by highly dynamic processes.

310 Lastly,  $\beta$ -cells are likely to influence the state of T cells within islets. We reasoned that islets  
311 lacking  $\beta$ -cells but containing immune cells could provide information regarding the role of  $\beta$ -  
312 cells in regulating the CD8<sup>+</sup>T cell compartment. We therefore examined CD8<sup>+</sup>T cells in islets from  
313 the  $\beta$ -cell Depleted + Immune group relative to those in islets from the Inflamed group. We found  
314 that TOX was expressed by a higher frequency of CD8<sup>+</sup>T cells in  $\beta$ -Cell Depleted + Immune islets  
315 than CD8<sup>+</sup>T cells in Inflamed islets (Figure 3.G), indicating that TOX<sup>-</sup> CD45RO<sup>+</sup> T cells are either  
316 short lived or exit upon loss of  $\beta$ -cells. In addition, CD45RA was enriched in CD8<sup>+</sup>T cells in  $\beta$ -cell  
317 Depleted + Immune islets and that CD45RO was depleted (Figure 3.G). This suggests that  
318 CD45RA<sup>+</sup> CD8<sup>+</sup>T cells convert to CD45RO<sup>+</sup> in islets and that  $\beta$ -cells are necessary for this process.  
319 If this model is correct, CD45RA<sup>+</sup> CD8<sup>+</sup>T cells in Inflamed islets are specific for islet antigens and  
320 are not inert bystanders. Together, these data indicate that islet CD8<sup>+</sup>T cells are stimulated upon  
321 entering islets and the factors that regulate this process are highly dynamic (Figure 3.H).

## 322 **Vasculature, nerves, and Granzyme-B<sup>+</sup>/CD3<sup>-</sup> cells** 323 **outside islets are associated with the lobular patterning** 324 **of islet pathogenesis**

325 The destruction of islets in T1D is known to exhibit lobular patterning (Gepts 1965). Specifically,  
326 islets in the same lobule are likely to be in the same stage of disease. This architecture suggests

327 that the states of islets within the same lobule are coordinated but the cell types responsible are  
328 unknown. To systematically investigate lobular patterning in T1D, we used a neural network to  
329 segment lobules and assign each single cell to its lobule. We used the intra-class correlation  
330 coefficient (ICC) to quantify the variation in islet pseudotime within a lobule relative to variation  
331 in islet pseudotime donor wide. ICC ranges from 0 to 1 with cases closer to 1 having a stronger  
332 lobular effect on islet pseudotime (Figure 4.A). Islets of non-T1D cases and 6314, 6195, and 6323  
333 did not have appreciable variability in their pseudotimes, so the ICC was not applicable, but in  
334 the remaining cases, the ICCs ranged from 0.17 to 0.74 (Figure 4.B). This highlights that the  
335 magnitude of lobular patterning ranges widely across T1D cases with insulinitis and thus could be  
336 influenced by donor characteristics such as the time since diagnosis, etiology or genetics.

337 To identify cell types that coordinate the behavior of islets within lobules, we employed  
338 hierarchical linear modeling (HLM), a statistical framework designed to identify relationships  
339 between different levels of multi-level data. HLMs are standard in many fields where multi-level  
340 data are common (Gelman et al. 2014.) and have been applied in biomedical settings (Jerby-  
341 Arnon and Regev 2022; Yi et al. 2019). We were interested in cell-types if their abundance per  
342 lobule correlated with the average islet pseudotime per lobule. Importantly, we omitted cells  
343 located in islets from the calculation of a cell type's lobular abundance so that information from  
344 the pseudotime analysis would not leak into this analysis. For each cell type, we estimated the  
345 effect of its total abundance in a lobule (the number of cells divided by the number of acinar cells  
346 to normalize for lobule area) on the pseudotimes of islets in that lobule. We performed this  
347 analysis in two-level HLMs for each donor and a three-level HLM considering all donors together.

348 We then examined cell types that were significantly associated with lobules across multiple T1D  
349 tissue donors. The abundance of three cell types were associated with pseudotime in more than  
350 two cases. These were vasculature, Granzyme-B<sup>+</sup>/CD3<sup>-</sup> cells, and nerves, all of which were more  
351 abundant in lobules with islets late in pseudotime (Figure 4.C boxed rows, Figure 4.D). Samples  
352 from cases 6323 and 6195 which had very few insulin-containing islets, had increased  
353 abundances of vasculature, Granzyme-B/CD3<sup>-</sup> cells, and nerves (Supplemental Figure 1),  
354 indicating these changes persist at least until the entire tissue is afflicted. In addition, vasculature,  
355 Granzyme-B<sup>+</sup>/CD3<sup>-</sup> cells, and nerves were increased in Inflamed islets compared to Healthy islets  
356 indicating that they may serve a role in islets in addition to their role in the non-islet compartment  
357 (Supplemental Figure 4). It was noteworthy that the conventional pathogenic immune cells  
358 comprising insulinitis were not associated with lobular patterning. For example, CD8<sup>+</sup>T cells and  
359 macrophages were only significant in one donor, and CD4<sup>+</sup>T cells and B cells were significant in  
360 only two donors (Figure 4.C). Therefore, they may depend on detecting signals from vasculature,  
361 Granzyme-B<sup>+</sup>/CD3<sup>-</sup> cells, and nerves in the extra-islet tissue to target a given lobule and the islets  
362 therein.

## 363 **Immature tertiary lymphoid structures far from islets** 364 **are enriched in subjects with T1D**

365 We hypothesized that pancreatic niches may influence the extravasation, migration, or activation  
366 of T cells prior to them reaching islets. To characterize pancreatic niches that might influence

367 CD8<sup>+</sup>T cells, we identified Cellular Neighborhoods (CNs) in the pancreas (Schürch et al. 2020;  
368 Bhate et al. 2021). CNs are tissue regions that are homogeneous and have defined cell-type  
369 compositions. To identify CNs, briefly, single cells were clustered according to the cell-type  
370 composition of their twenty nearest spatial neighbors and automatically annotated with the  
371 names of enriched cell types (Figure 5.A, See Methods). This resulted in 75 CNs.

372 Next, we identified CNs that were more abundant in T1D than non-T1D tissues (Figure 5.B). The  
373 top three CNs (fold change of abundance in T1D relative to abundance in non-T1D) were (CD8<sup>+</sup>T  
374 cells|B Cells), (Macrophage|Stromal Cells|B Cells), and (Vasculature|B Cells). All were rich with  
375 B cells (Figure 5.B, Figure 5.C). We asked whether these three CNs were commonly adjacent to  
376 each other this could indicate that they act as components of a larger structure playing a  
377 functional role in the tissue (Bhate et al. 2021). Measuring the adjacency of the three B cell CNs  
378 demonstrated that the (CD8<sup>+</sup>T cells|B Cells) CN is predominantly found adjacent to both the  
379 other CNs but that (Macrophage|Stroma|B Cells) and (Vasculature|B Cells) are less commonly  
380 adjacent to each other (Figure 5.D).

381 We next asked whether these CN assemblies corresponded to either peri-vascular cuffs (Agrawal  
382 et al. 2013; Wekerle 2017) or tertiary lymphoid structures (TLSs) (Korpos et al. 2021; Rovituso et  
383 al. 2016; Agrawal et al. 2013), as these are two lymphoid-rich structures commonly present in  
384 autoimmune conditions. Although the (CD8<sup>+</sup>T cells|B Cells) CN was adjacent to vessels (Figure  
385 5.D, Figure 5.E), it was not in the fluid-filled perivascular space, as is the case with perivascular  
386 cuffs (Figure 5.E). In our samples, the (CD8<sup>+</sup>T cells|B Cells) CN did not have segregated T cell and  
387 B cell zones as seen in mature TLSs, but the size, abundance, and association with vasculature  
388 was comparable with those previously described of TLSs in human T1D (Korpos et al. 2021).

389 In summary, the (CD8<sup>+</sup>T cells|B Cells) CN is more abundant in T1D tissues that are undergoing  
390 active inflammation than in non-T1D tissues as well as in tissues of patients who had T1D for  
391 more than 4 years. Finally, this CN shares many architectural features of immature TLSs.

## 392 **Immature tertiary lymphoid structures are potential** 393 **staging areas for islet-destined CD8<sup>+</sup>T cells**

394 We next asked whether the (CD8<sup>+</sup>T cells|B Cells) CN had high endothelial venules (HEV),  
395 specialized blood vessels that enable naïve lymphocytes to extravasate into peripheral tissues,  
396 which are commonly found in TLSs. We observed expression of peripheral lymph node addressin  
397 (PNA<sup>d</sup>), an HEV marker, in the vessels associated with the (CD8<sup>+</sup>T cells|B Cells) CN (Figure 5.E left  
398 image) but not in other vessels (data not shown). Although we could not assess the presence of  
399 other TLS traits such as follicular dendritic cells, fibroblastic reticular cells, or follicular helper T  
400 cells, the cellular composition and presence of HEVs indicate that instances of the (CD8<sup>+</sup>T cells|B  
401 Cells) CN represent immature TLSs.

402 Next, we asked if immature TLSs were supporting the entry of naïve CD8<sup>+</sup>T cells into the pancreas.  
403 We observed CD8<sup>+</sup>T cells co-expressing CD45RA and CD62L (the ligand for PNA<sup>d</sup>) near PNA<sup>d</sup>  
404 vasculature (Figure 5.E, middle and right image respectively). Thus, naïve CD8<sup>+</sup>T cells in the  
405 pancreas can adhere to HEV receptors. Furthermore, CD45RA<sup>+</sup> was enriched three-fold on CD8<sup>+</sup>T  
406 cells in the (CD8<sup>+</sup>T cells|B Cells) CN relative to CD8<sup>+</sup>T cells in the tissue as a whole (Figure 5.F),

407 providing additional evidence that naïve T cells enter the pancreas through HEVs in the (CD8<sup>+</sup>T  
408 cells|B Cells) CN.

409 To determine if immature TLSs delivered naïve lymphocytes directly to islets or acted as  
410 “staging areas” by depositing them far from islets, we quantified the frequency of TLSs adjacent  
411 to islets. We found that instances of the (CD8<sup>+</sup>T cells|B Cells) CN both adjacent (Figure 5.G.1) or  
412 not adjacent (Figure 5.G.2) to islets. Quantifying this adjacency frequency revealed that fewer  
413 than half were adjacent to islets (Figure 5.H). We reasoned that even if TLSs were far from  
414 islets, extravasating cells may migrate to islets from TLSs. Accordingly, islet-adjacent CD45RA<sup>+</sup>  
415 CD8<sup>+</sup>T cells (that were not in islet-adjacent TLSs) co-expressed CD62L, suggesting that they  
416 originated from the (CD8<sup>+</sup>T cells|B Cell) CN (Figure 5.I). Consistent with this, in one notable  
417 tissue donor, regions of the pancreas with  $\beta$ -cell depleted islets were enriched in the (CD8<sup>+</sup>T  
418 cells|B Cell) CN relative to regions of the pancreas with  $\beta$ -cell containing islets (Figure 5.J). This  
419 spatial correlation between the (CD8<sup>+</sup>T cells|B Cells) CN and the destruction of islets implicates  
420 the CN directly with islet pathology even when it is not adjacent to islets (Figure 5.J). Therefore,  
421 our data indicate that immature TLSs act as staging areas by enabling naïve CD8<sup>+</sup>T cells to enter  
422 the pancreas far from islets where they then traffic to islets.

## 423 Discussion

424 We have performed a comprehensive, pseudotemporal analysis of whole pancreatic tissue in T1D  
425 using CODEX imaging of cadaveric pancreatic tissues from T1D subjects and computational  
426 approaches. Our data support several conclusions.

427 First, a conserved trajectory of insulinitis is present across individual donors and stages of T1D  
428 progression. This trajectory is comprised of four sub-states of insulinitis each characterized by  
429 CD8<sup>+</sup>T cells at different stages of activation. Moreover, they indicate that T cells receive additional  
430 stimulation after entering islets. Multiple inflamed sub-clusters were represented in all T1D  
431 donors, indicating that the sub-clusters reflect sub-states capable of inter-converting rather than  
432 distinct trajectories of insulinitis that stratify patients.

433 In addition, we observed that IDO<sup>+</sup> vasculature was present in inflamed islets with higher  
434 frequencies of CD8<sup>+</sup>T cells but rare in islets that have lost insulin and contain immune cells,  
435 suggesting that IDO is a tolerogenic checkpoint that is lost prior to  $\beta$ -cell death. Leveraging this  
436 checkpoint to protect transplanted  $\beta$ -cells from rejection has shown promise (Alexander et al.  
437 2002) and could be combined with similar approaches using programmed death-ligand 1  
438 (Yoshihara et al. 2020; Castro-Gutierrez et al. 2021).

439 These data support a model wherein all islets in all T1D cases pass through a series of insulinitis  
440 substages – perhaps corresponding to immunoregulatory checkpoints - before  $\beta$ -cells are  
441 destroyed. This model extends the one previously suggested by Damond et al, who proposed a  
442 single trajectory for insulinitis (Damond et al. 2019).

443 Second, pancreatic lobules affected by insulinitis are characterized by distinct tissue markers. We  
444 discovered that lobules enriched in  $\beta$ -cell-depleted islets were also enriched in nerves,  
445 vasculature, and Granzyme-B<sup>+</sup>/CD3<sup>-</sup> cells, suggesting these factors may make particular lobules  
446 permissive to disease. This could be through recruiting immune cells selectively into islets of

447 particular lobules. Alternatively, the infiltration of a small number of islets in an otherwise  
448 unaffected lobule could be a rate-limiting step after which the exocrine space promotes fast  
449 dissemination of pathogenic immune cells within the lobule. The role of islet enervation in T1D  
450 has been studied but such work has focused on nerves in the islet rather than nerves throughout  
451 the lobule (Christoffersson, Ratliff, and von Herrath 2020). It is noteworthy that the cell types  
452 linked with direct islet invasion were distinct from those linked to lobule targeting even though  
453 both sets of cell types were found across islet and non-islet regions. Therefore, for insulinitis to  
454 consume every islet, crosstalk may be required between the cell types of both compartments.  
455 Conversely, inhibiting this interaction might contain pathology to isolated lesions.

456 Finally, we identify “staging areas” - immature tertiary lymphoid structures away from islets  
457 where CD8<sup>+</sup>T cells assemble, most likely before they navigate to islets Our pseudotime analysis  
458 data suggest naïve CD8<sup>+</sup>T cells can enter the pancreas within these “staging areas” before  
459 migrating to islets. Similar structures were observed in mice where blocking immune egress from  
460 lymph nodes led to a contraction in the size of TLSs and halted diabetes (Penaranda et al. 2010).  
461 Thus, therapeutic targeting of immune cell trafficking to TLS could mitigate sustained  
462 autoimmunity against  $\beta$ -cells in human T1D.

463 Together, these data implicate both the local islet microenvironment and inflammation at distal  
464 sites within the pancreas in insulinitis progression. Our findings expand both the anatomical and  
465 cellular scope of autoimmunity in T1D.

466 A major limitation for the study is the cohort size. Cases with documented insulinitis are very rare,  
467 significantly limiting the feasibility of curating large cohorts. While we did examine over 2,000  
468 individual islets and included both non-diabetic and pre-diabetic controls, larger studies with  
469 more diverse patient donor cohorts are needed.

470 Another limitation is our limited perspective on myeloid cell populations. Although antibodies in  
471 our panel detect numerous myeloid markers, we failed to identify any heterogeneity in myeloid  
472 populations during insulinitis. This was likely due in part to the difficulty of segmenting myeloid  
473 cells and quantifying marker expression due to their morphology. Combining spatial or non-  
474 spatial transcriptomics could be used in future studies to better define the myeloid populations  
475 and extend the CODEX panel.

476 Lastly, our samples are 2-dimensional sections which could affect some of the adjacency  
477 relations.

478 In conclusion, using a data-driven approach, we mapped conserved sub-states of insulinitis to infer  
479 regulatory checkpoints that fail in T1D and integrated the spatial pathology of islet and non-islet  
480 regions into a single model of T1D pathogenesis. The tools and computational pipelines  
481 developed here will enable further investigation of immune pathology at the tissue scale that  
482 may lead to development of therapies for T1D.

483



## 484 **Methods**

### 485 **Human tissues**

486 Cadaveric pancreatic FFPE tissue sections were obtained through the nPOD program, sponsored  
487 by the Juvenile Diabetes Research Fund. Case numbers cited herein are assigned by nPOD and  
488 comparable across nPOD-supported projects. 17 cases in the nPOD biorepository had been  
489 previously documented to possess insulinitis. For each of these 17 cases, we examined the triple  
490 stained IHC images (CD3, Insulin, and Glucagon) using nPOD's online pathology database to select  
491 blocks in which insulinitis was present. To ensure that the tissue regions still contained insulinitis  
492 (and had not been sectioned extensively since their images were uploaded to the nPOD  
493 pathology database), we re-sectioned and visualized CD3, Insulin, and Glucagon. We then  
494 selected 2 cases at different stages of disease (as defined by time since diabetes diagnosis). 3  
495 non-diabetic age matched cases were selected as negative controls. The use of cadaveric human  
496 tissue samples is approved by Stanford University's Institutional Review Board.  
497

### 498 **CODEX data collection**

499 *CODEX Antibody Generation and Validation.* Oligonucleotides were conjugated to purified,  
500 carrier-free, commercially available antibodies as previously described (Schürch et al. 2020;  
501 Kennedy-Darling et al. 2021). For validation experiments, human tonsil and pancreas tissues were  
502 co-embedded in a new FFPE blocks so both tissues could be stained and imaged simultaneously.  
503 Each antibody in the CODEX panel was validated by co-staining with previously established  
504 antibodies targeting positive and negative control cell-types. Once validated, the concentration  
505 and imaging exposure time of each antibody were optimized. The tissue staining patterning was  
506 compared to the online database, The Human Protein Atlas, and the published literature. The  
507 specificity, sensitivity, and reproducibility of CODEX staining has been previously validated  
508 (Schürch et al. 2020; Kennedy-Darling et al. 2021; Black et al. 2021; Phillips, Schürch, et al. 2021;  
509 Phillips, Matusiak, et al. 2021)  
510

511 *CODEX Staining.* Staining and imaging was conducted as previously described (Schürch et al.  
512 2020; Kennedy-Darling et al. 2021; Phillips, Schürch, et al. 2021; Black et al. 2021). Briefly, FFPE  
513 tissues were deparaffinized and rehydrated. Heat-induced epitope retrieval (HIER) antigen  
514 retrieval was conducted in Tris/EDTA buffer at pH9 (Dako) at 97°C for 10 minutes. Tissues were  
515 blocked for 1 hour with rat and mouse Ig, salmon-sperm DNA, and a mixture of the non-  
516 fluorescent DNA oligo sequences used as CODEX barcodes. Tissues were stained with the  
517 antibody cocktail in a sealed humidity chamber overnight at 4°C with shaking. The next day,  
518 tissues were washed, fixed with 1.6% paraformaldehyde, 100% methanol, and BS3 (Thermo  
519 Fisher Scientific), and mounted to a custom-made acrylic plate attached to the microscope.  
520

521 *CODEX Imaging.* Imaging was conducted using the Keyence BZ-X710 fluorescence microscope  
522 with a CFI Plan Apo  $\lambda$  20x/0.75 objective (Nikon). "High resolution" mode was selected in Keyence  
523 Navigator software, resulting in a final resolution of .37744  $\mu\text{m}/\text{pixel}$ . The exposure times are  
524 listed in Supplemental Table 3. Regions for imaging were selected by rendering HLA-ABC,  
525 Proinsulin, and CD8 and selecting multiple bounding boxes to maximize the amount of tissue



526 imaged and minimize imaging of empty coverslip. Depending on the tissue shape and islet  
527 distribution, each donor was imaged across 2-7 regions ranging from 5x5 to 10x 3mm per region.  
528 The full antibody panel and cycle-ordering is detailed in (Supplemental Tables 3 and 4).  
529 Biotinylated hyaluronan-binding protein was rendered by adding streptavidin-PE at 1:500  
530 concentration to the 96 well plate containing fluorescent oligos in the last cycle and running the  
531 CODEX program normally. DRAQ5 was added to the last cycle because we found it stained nuclei  
532 more evenly than HOECHST which slightly improved segmentation. Tissues took between 3 and  
533 7 days to image depending on the tissue area.

534  
535 *Image Pre-processing.* Drift compensation, deconvolution, z-plane selection was performed using  
536 the CODEX Toolkit uploader ([github.com/nolanlab/CODEX](https://github.com/nolanlab/CODEX), Goltsev et al. 2018). Cell  
537 segmentation using the DRAQ5 nuclear channel and lateral bleed compensation was performed  
538 with CellSeg (Lee et al. 2022).

539

## 540 Cell Type Clustering and Annotation

541 Marker expression was z-normalized within each donor and subsequently clustered in two steps.  
542 First, cells were projected into 2 dimensions using the ‘Tissue markers’ indicated in Supplemental  
543 Table 2 and Parametric Uniform Manifold Approximation and Projection (pUMAP)(Sainburg,  
544 McInnes, and Gentner 2021) was applied on a downsampled dataset. The fit model was used to  
545 transform the remaining cells. Cell types were gated using Leiden clustering and manual merging.  
546 The cluster containing immune cells was sub-clustered using the ‘Immune Markers’ detailed in  
547 Supplemental Table 2. Acinar cells contaminating the Immune cluster were gated out and merged  
548 with the Acinar cluster from the previous step. The Endocrine class was sub-clustered into  $\alpha$ -,  $\beta$ -  
549 , and  $\delta$ -Cells using Glucagon, Proinsulin, and Somatostatin respectively. Clusters were annotated  
550 according the heatmap marker expression.

551

## 552 Islet Segmentation and Pseudotime

553 *Preprocessing.* Windows consisting of the twenty nearest spatial neighbors surrounding each  
554 single cell were clustered according to their cell-type composition using Mini Batch K Means with  
555  $k=200$ . For this analysis,  $\alpha$ -,  $\beta$ -, and  $\delta$ -Cells were combined into one ‘Endocrine’ cell type. One  
556 cluster was highly enriched in Endocrine cells and accurately defined the islet area. Individual  
557 islets were identified using the connected components algorithm and filtering out islets that had  
558 fewer than ten total cells. For each islet, the number of each cell type inside the islet and between  
559 the islet edge and 20 $\mu$ m beyond were extracted. To adjust for variation due to the islet size, the  
560 cell type counts were divided by the number of endocrine cells inside the islet. Data were then  
561 log-transformed.

562

563 *PAGA Analysis.* The PAGA embedding was computed using the default parameters except for the  
564 following: The neighborhood search was performed using cosine distance and 15 nearest  
565 neighbors; Leiden clustering used a resolution of 1. For computing the pseudotime values (used  
566 in the colormap in Figure 2B, the x-axis in Figure 2F, and Figure 4), the path through the inflamed  
567 islet was isolated by temporarily omitting 25 islets positioned in the middle of the map between  
568 Healthy and  $\beta$ -cell depleted islets. Only 9 of these were from T1D or pre-T1D donors.

569

## 570 Quantification and Validation of Functional Marker Gating

571 *Annotation of Ground-Truth Dataset.* 3963 CD8<sup>+</sup>T cells were labelled for fifteen markers by an  
572 immunologist familiar with the staining patterns of each marker using VGG Image annotator  
573 (Abhishek Dutta and Andrew Zisserman 2019).

574

575 *Automated Thresholding.* For each functional marker of interest, the lateral-bleed-compensated  
576 mean fluorescence (Lee et al. 2022) of background cells were used to calculate a background  
577 distribution. Background cells were cells except those assigned to cell types that were known to  
578 express the markers of interest or autofluorescence. Marker-positive cells were defined as those  
579 whose expression was greater than the 99<sup>th</sup> percentile of the background distribution.

580

581 *Gating with Neural Network:* Cell images were split into training, validation, and test splits (60/  
582 15/25). The ResNet50 architecture and initial weights were imported from the Keras library pre  
583 trained on ImageNet. Image augmentation consisted of random flips, rotations, zooms, contrast,  
584 and translation (+/- ten pixels only). All weights were unfrozen, and the model was trained for  
585 100 epochs (see attached source code for training details).

586

## 587 Sub-clustering of Inflamed Islets with Cell-Type specific Functional

### 588 Markers

589 For each Inflamed Islet (n=351), the frequency of each marker expressed by CD8<sup>+</sup>T cells was  
590 computed. Single cells inside the islet and within 20 $\mu$ m from the islet's edge were combined  
591 before the frequency was measured. The subsequent matrix underwent z-normalization  
592 followed by UMAP and clustering using Bokeh.  $\beta$ -Cell Depleted + Immune Islets were defined as  
593 islets without  $\beta$ -cells with greater than two CD8<sup>+</sup>T cells and greater than seven macrophages.  
594 These thresholds correspond to the 95<sup>th</sup> percentiles of CD8<sup>+</sup>T cells and macrophages in Healthy  
595 islets.

596

## 597 Identification of Cellular Neighborhoods

598 Previously, CNs (Schürch et al. 2020) were identified by, for each single cell, defining its 'window'  
599 as the 20 spatial nearest neighbors. Cells were clustered according to the number of each cell  
600 type in their windows using Mini Batch K-Means. The output clusters corresponded to CNs. To  
601 ensure our method was sensitive to rare neighborhoods, we adapted this algorithm by  
602 intentionally over-clustering, using k=200 in the K- Means step rather than using a k ranging from  
603 10-20 as used elsewhere (Bhate et al. 2021; Phillips, Matusiak, et al. 2021; Shekarian et al. 2022).  
604 Next, to determine which cell types were characteristic of each cluster, we identified, for each  
605 cluster, the set of cell-types that were present in more than 80% of the windows allocated to that  
606 cluster. We named the clusters according to this set of cell-types and merged all clusters with the  
607 same name, resulting in seventy-five CNs. Acinar cells and epithelial cells were used in the kNN  
608 graph and in the clustering but were not considered when merging clusters. Note that this  
609 method does not differentiate neighborhoods that have the same combination of cell types but  
610 different stoichiometries.

## 611 Lobule Segmentation

612 A training dataset was generated by manually tracing the edges of lobules in ImageJ using the  
613 ROI function. The ROI were then floodfilled in Python and used as masks for training. For each  
614 tile, the blank cycle was selected to distinguish tissue from background coverslip. A U-Net  
615 model was trained for 10 epochs (see attached source code for training details). After stitching  
616 together all masks, the resulting images required slight refinement where lobules were not  
617 completely separated, and this was done manually in ImageJ. The connected components in the  
618 stitched image defined the lobule instances. Cells were assigned to a lobule by indexing the  
619 lobule mask with their X and Y coordinates. Cells in the inter-lobular space were assigned to  
620 one “edge” lobule. This resulted in 464 lobules.

621

## 622 Formulation of Hierarchical Linear Models

623 For each lobule, the number of each cell type in non-islet cells was divided by the number of  
624 acinar cells in the lobule. For all HLMs, the lme4 package for R was used (Bates et al. 2015) and  
625 statistical significance was computed using the lmerTest package for R (Kuznetsova, Brockhoff,  
626 and Christensen 2017). Lobular cell-type abundance was z-normalized within each donor and  
627 the pseudotime was z-normalized across the entire dataset prior to fitting. For each cell type, a  
628 two-level, random intercept HLM within each donor was constructed with the following  
629 formulation (in R formula syntax):  $pseudotime_{islet} \sim celltype_{lobule} + (1|lobuleID)$  and a three-level  
630 random intercept, random slope HLM including islets from all donors was formulated:  
631  $pseudotime_{islet} \sim celltype_{lobule} + (1 + celltype_{lobule} | donorID) + (1|lobuleID)$ . Here,  $pseudotime_{islet}$   
632 equals the pseudotime of each islet,  $celltype_{lobule}$  equals the number of the given cell type in a  
633 particular lobule divided by the number of acinar cells in that lobule, z-normalized within each  
634 donor, and  $lobuleID$  and  $donorID$  are categorical variables specifying the lobule and donor that  
635 the given islet belongs to.

636

## 637 Neighborhood Adjacency

638 The adjacency between neighborhoods was computed as in (Bhate et al. 2021). The only  
639 modification was that neighborhood instances were identified using connected components of  
640 the k-NN graph with k=5 rather than from the thresholded images.

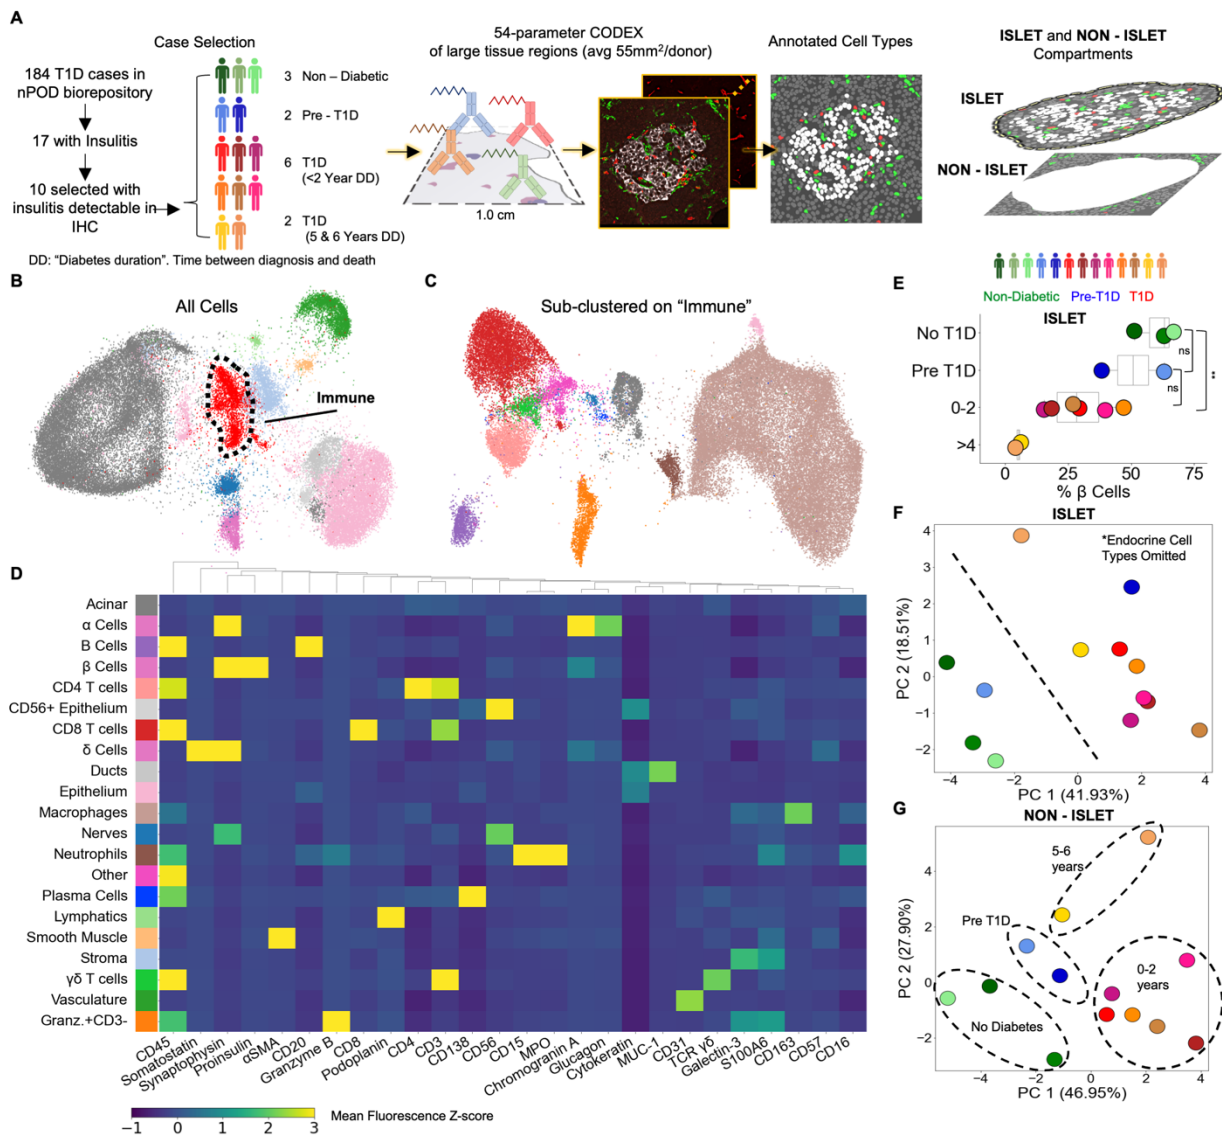

641  
642 **Figure 1 Profiling of T1D pancreata with CODEX high-parameter imaging reveals**  
643 **alterations in islet and non-islet regions.**

644 Figure 1.A Left: Schematic of the workflow for selection of nPOD cases. Blues, greens, and reds  
645 indicate non-diabetic, pre-T1D, or T1D status, respectively. Center: Schematic for acquisition and  
646 processing of CODEX highly multiplexed imaging dataset. Right: Schematic of islet and non-islet  
647 pancreatic regions.

648 Figure 1.B UMAP and Leiden clustering of major cell types. Colors match those in heatmap shown  
649 in Figure 1D, except for the immune cluster, which is shown in red.

650 Figure 1.C UMAP of immune cluster further clustered from the immune population identified in  
651 Figure 1B. Colors match those in heatmap shown in Figure 1D.

652 Figure 1.D Heatmap of mean z-normalized marker expression in each cell-type cluster (color-  
653 coded on the left). Only a subset of the markers used for the UMAP are included in the heatmap  
654 to facilitate visualization. A full description of the markers used for the clustering stages is  
655 available in Supplemental Table 2.

656 Figure 1.E Frequency of  $\beta$ -Cells per donor determined by dividing the number of  $\beta$ -cells by the  
657 total number of  $\beta$ -cells,  $\alpha$ -cells, and  $\delta$ -Cells. Blues, greens, and reds indicate non-diabetic, pre-  
658 T1D, or T1D status, respectively. Significance was determined using the t-test (\*  $p < 0.05$ , \*\*  
659  $p < 0.01$ , \*\*\*  $p < 0.001$ )

660 Figure 1.F Principal component analysis of islet compartment. The number of cells of each cell  
661 type (omitting  $\alpha$ -,  $\beta$ -, and  $\delta$ -cells) were divided by the number of endocrine cells to adjust for  
662 different islet areas. Blues, greens, and reds indicate non-diabetic, pre-T1D, or T1D status,  
663 respectively.

664 Figure 1.G Principal component analysis of non-islet compartment. The number of cells of each  
665 cell type (omitting  $\alpha$ -,  $\beta$ -, and  $\delta$ -cells) were divided by the number of acinar cells to adjust for  
666 different areas imaged. Blues, greens, and reds indicate non-diabetic, pre-T1D, or T1D status,  
667 respectively.

668



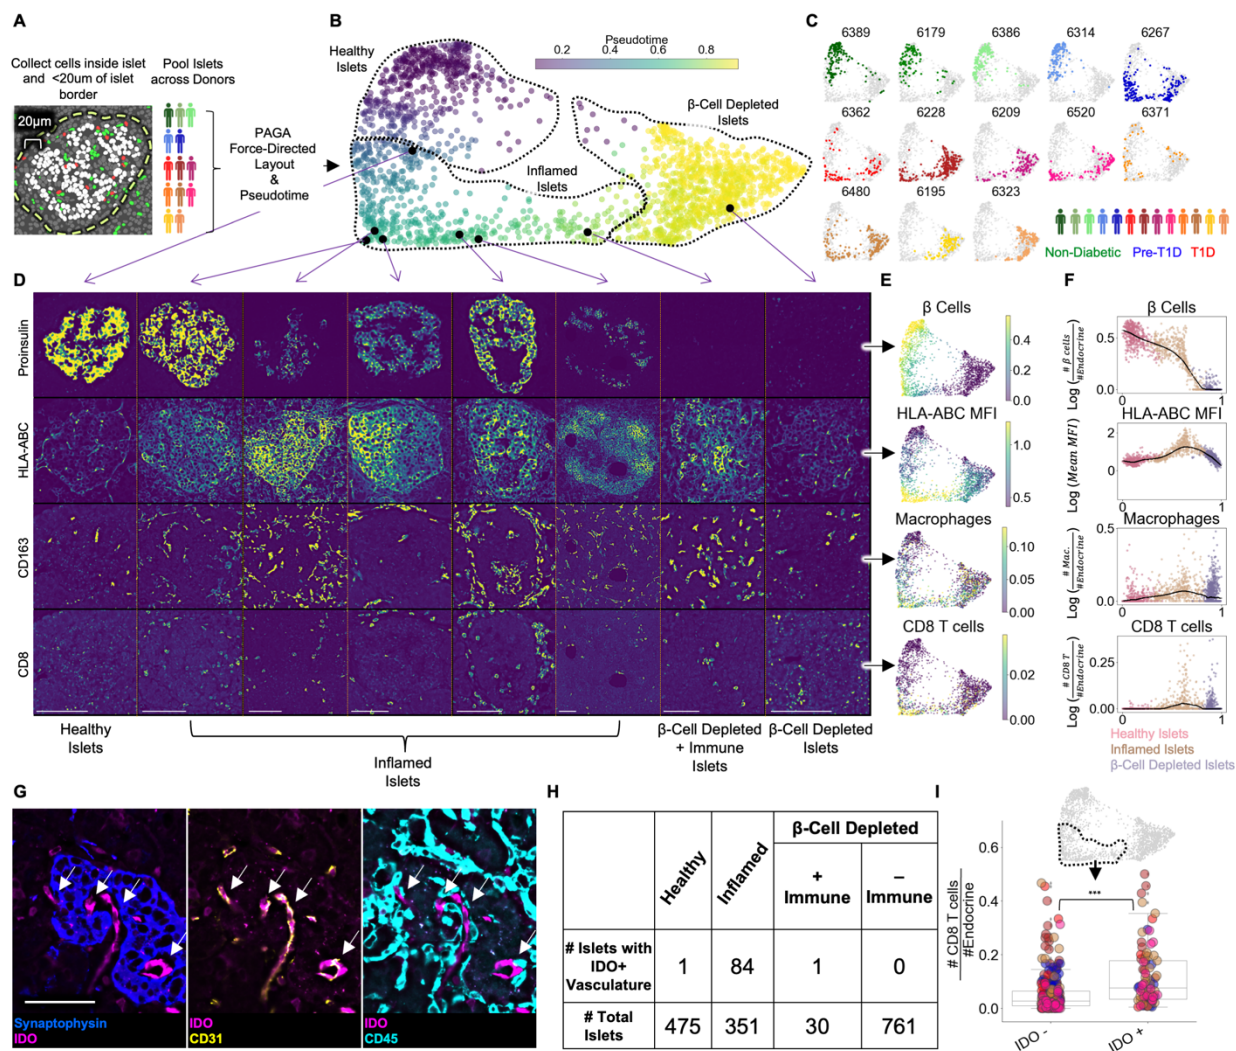

669  
670

671 **Figure 2 Pseudotemporal reconstruction of insulinitis identifies IDO on islet vasculature as a**  
672 **regulatory checkpoint.**

673 Figure 2.A Schematic of islet segmentation and quantification of islet cellular composition.

674 Figure 2.B PAGA-force directed layout of islets colored by pseudotime. The start point of  
675 pseudotime was calculated as the centroid of the non-diabetic islets. Representative islets from  
676 different stages of pseudotime are indicated with black points and their raw images are depicted  
677 in Figure 2.D Healthy, Inflamed, and β-Cell Depleted were identified by examining the cell  
678 composition of the clusters obtained internally by the PAGA algorithm (Supplemental Figure 2.A).

679 Figure 2.C Islet distribution across pseudotime for each donor. The titles indicate nPOD case IDs  
680 as in Supplemental Table 1.



681 Figure 2.D Images of Proinsulin, HLA-ABC, CD163, and CD8 staining in islets representative of  
682 different points along pseudotime as indicated in B. Scale bars (lower left of each column)  
683 indicate 100 $\mu$ m.

684 Figure 2.E Quantification of selected features across pseudotime overlaid onto the PAGA force-  
685 directed layout. For  $\beta$ -cells, macrophages, and CD8<sup>+</sup>T cells, the values correspond to log(# cells/#  
686 endocrine cells). For HLA-ABC, the mean HLA-ABC expression for each cell in the islet was  
687 computed and log transformed.

688 Figure 2.F Quantification of selected features across pseudotime. For  $\beta$ -cells, macrophages, and  
689 CD8<sup>+</sup>T cells, the values correspond to log(# cells/# endocrine cells). For HLA-ABC, the mean HLA-  
690 ABC expression for each cell in the islet was computed and log transformed. Color legend:  
691 Healthy islets: pink; Inflamed islets: brown;  $\beta$ -Cell Depleted islets: purple. Black points demarcate  
692 LOWESS regression.

693 Figure 2.G Representative image of an islet from the Inflamed group stained with IDO and, from  
694 left to right, Synaptophysin, CD31, and CD45. Arrows indicate IDO<sup>+</sup>/CD31<sup>+</sup> vasculature. Right  
695 shows that IDO<sup>+</sup> cells are negative for CD45 and therefore, are not myeloid cells associated with  
696 vasculature. Scale bar (bottom left image) indicates 50  $\mu$ m.

697 Figure 2.H Distribution of IDO expression on islet vasculature across pseudotime.

698 Figure 2.I Association of IDO<sup>+</sup> islet vasculature with islet CD8<sup>+</sup>T cell density. The y-axis corresponds  
699 to the number of CD8<sup>+</sup>T cells per endocrine cell per islet. CD8<sup>+</sup>T cell counts were normalized to  
700 adjust for islet size. The x-axis indicates islets whether islets contain IDO<sup>+</sup> vasculature. Each color  
701 corresponds to a donor. All donors with detectable IDO<sup>+</sup> Islet vasculature are displayed which  
702 consisted of 6480, 6267, 6520, 6228, and 6362. Colors are same as in Figure 2.C. IDO<sup>+</sup> vasculature  
703 was manually quantified. For combined donors, significance was determined with a mixed-effect  
704 linear model,  $p = 1.5 \times 10^{-12}$  (Satterthwaites's method lmerTest R package).

705

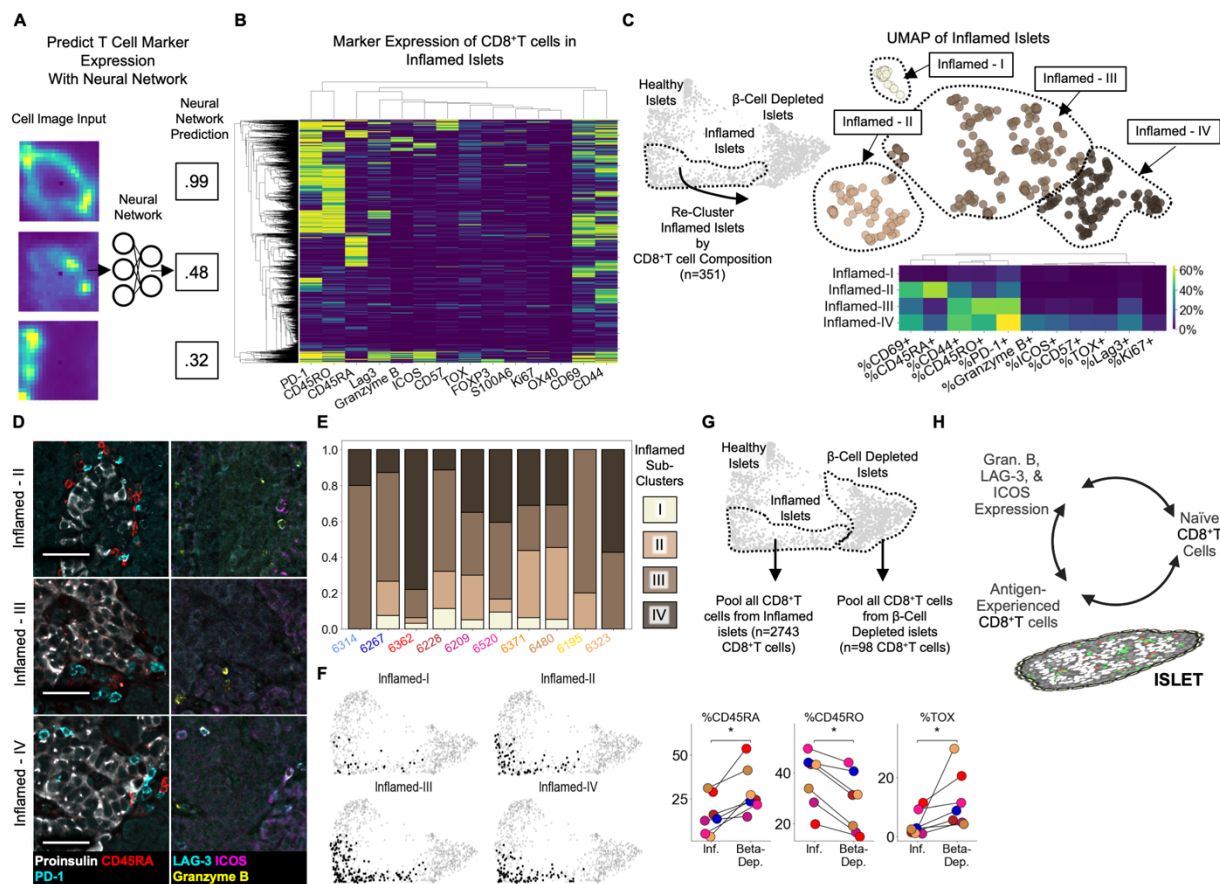

706

707 **Figure 3 Insulitis has sub-states, characterized by CD8<sup>+</sup>T cell functionality**

708 Figure 3.A Schematic of marker-quantification with a ResNet50 neural network. Raw images are  
 709 input, and the neural network outputs a number between 0 and 1 indicative of the level of  
 710 confidence that the cell expresses that marker with 1 indicating the highest confidence.

711 Figure 3.B Heatmap of all 2,855 Inflamed Islet CD8<sup>+</sup>T cells, hierarchically clustered according to  
 712 marker expression predicted by the neural network.

713 Figure 3.C Top) UMAP of Inflamed Islets based on frequencies of markers on CD8<sup>+</sup>T cells in islets.  
 714 Bottom) Mean frequencies of each marker on CD8<sup>+</sup>T cells in islets of each inflamed sub-cluster.

715 Figure 3.D Representative images of islets from each subcluster with associated immune markers.  
 716 Scale bars indicate 50 μm.

717 Figure 3.E Frequencies of islets from each subcluster per donor in pre-T1D and T1D samples. Color  
 718 indicates subcluster as in panel C.

719 Figure 3.F Distribution of the islets of Inflamed-I through -IV on the PAGA force-directed layout  
 720 shown in Figure 2.B

721 Figure 3.G Differences in marker expression frequencies between CD8<sup>+</sup>T cells in islets from the  
 722 Inflamed group and from the β-Cell Depleted + Immune group. T cells from all islets of the

723 specified groups were pooled within each donor to compute the frequencies of marker  
 724 expression. Significance was determined using the Wilcoxon signed-rank test (\*  $p < 0.05$ , \*\*  
 725  $p < 0.01$ , \*\*\*  $p < 0.001$ ) and was not corrected for multiple hypothesis testing.

726 Figure 3.H Proposed model of coordinated T cell states in islets due to stimulation and re-  
 727 stimulation of CD8<sup>+</sup>T cells in islets.

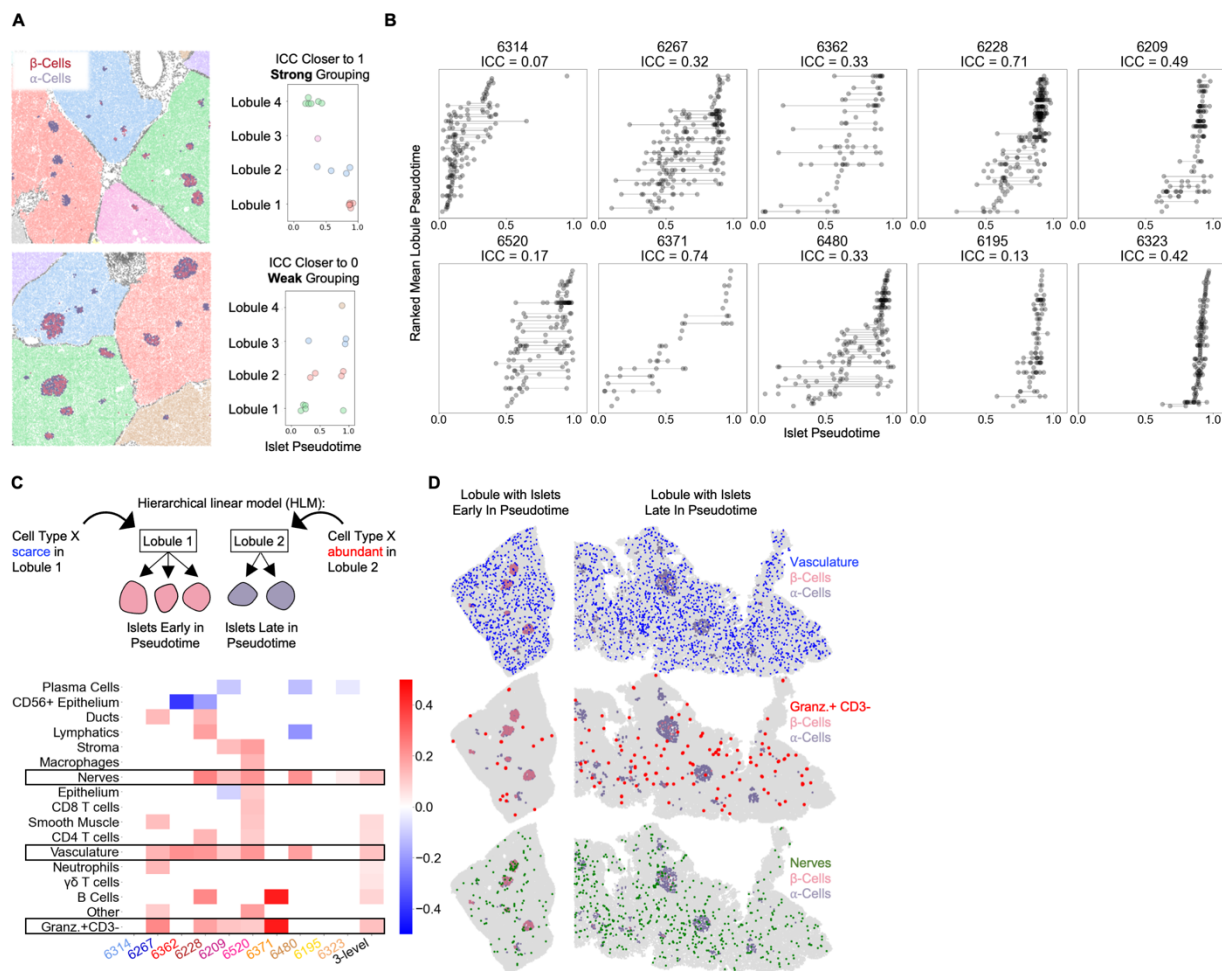

728

729 **Figure 4 Vasculature, nerves, and Granzyme-B<sup>+</sup>/CD3<sup>-</sup> cells outside islets are associated with**  
 730 **the lobular patterning of islet pathogenesis**  
 731 Figure 4.A A schematic of the method for quantifying lobular patterning of insulinitis. Lobules were  
 732 segmented and individual islets were mapped back to the lobules where they were found. Top:  
 733 An example region with a strong lobular grouping effect and an ICC closer to 1. Bottom: An  
 734 example region with a weak lobular grouping effect and an ICC closer to 0.

735 Figure 4.B Islet pseudotimes in each nPOD donor with pre-T1D or T1D grouped by lobule. Each  
 736 point represents an islet. The x-axis represents the islet pseudotime. The y-axis represents each  
 737 lobule ranked by the mean pseudotime of islets in that lobule. Violin plots per lobule are overlaid.  
 738 Abbreviations: ICC: Intraclass correlation coefficient.

739 Figure 4.C Cell types associated with lobular patterning. Top: Schematic of the hierarchical linear  
 740 model. Cells in islets were omitted when computing the lobular abundance of each cell-type.  
 741 Bottom: Coefficients of two-level models trained on each donor separately (columns labeled by  
 742 donor) and a three-level model (right column). Color corresponds to the coefficient and features  
 743 with  $p > 0.05$  are white. Significance was determined using Satterthwaites's method in the  
 744 lmerTest R package. No adjustment for multiple hypothesis testing was applied.

745 Figure 4.D Visualization of vasculature (top), Granzyme-B/CD3- cells (middle), and nerves  
 746 (bottom) in two lobules. The left lobule represents lobules with islets earlier in pseudotime and  
 747 a lower abundance of the given cell type in the lobule. The right lobule represents lobules with  
 748 islets late in pseudotime and a greater abundance of the given cell type in the lobule.

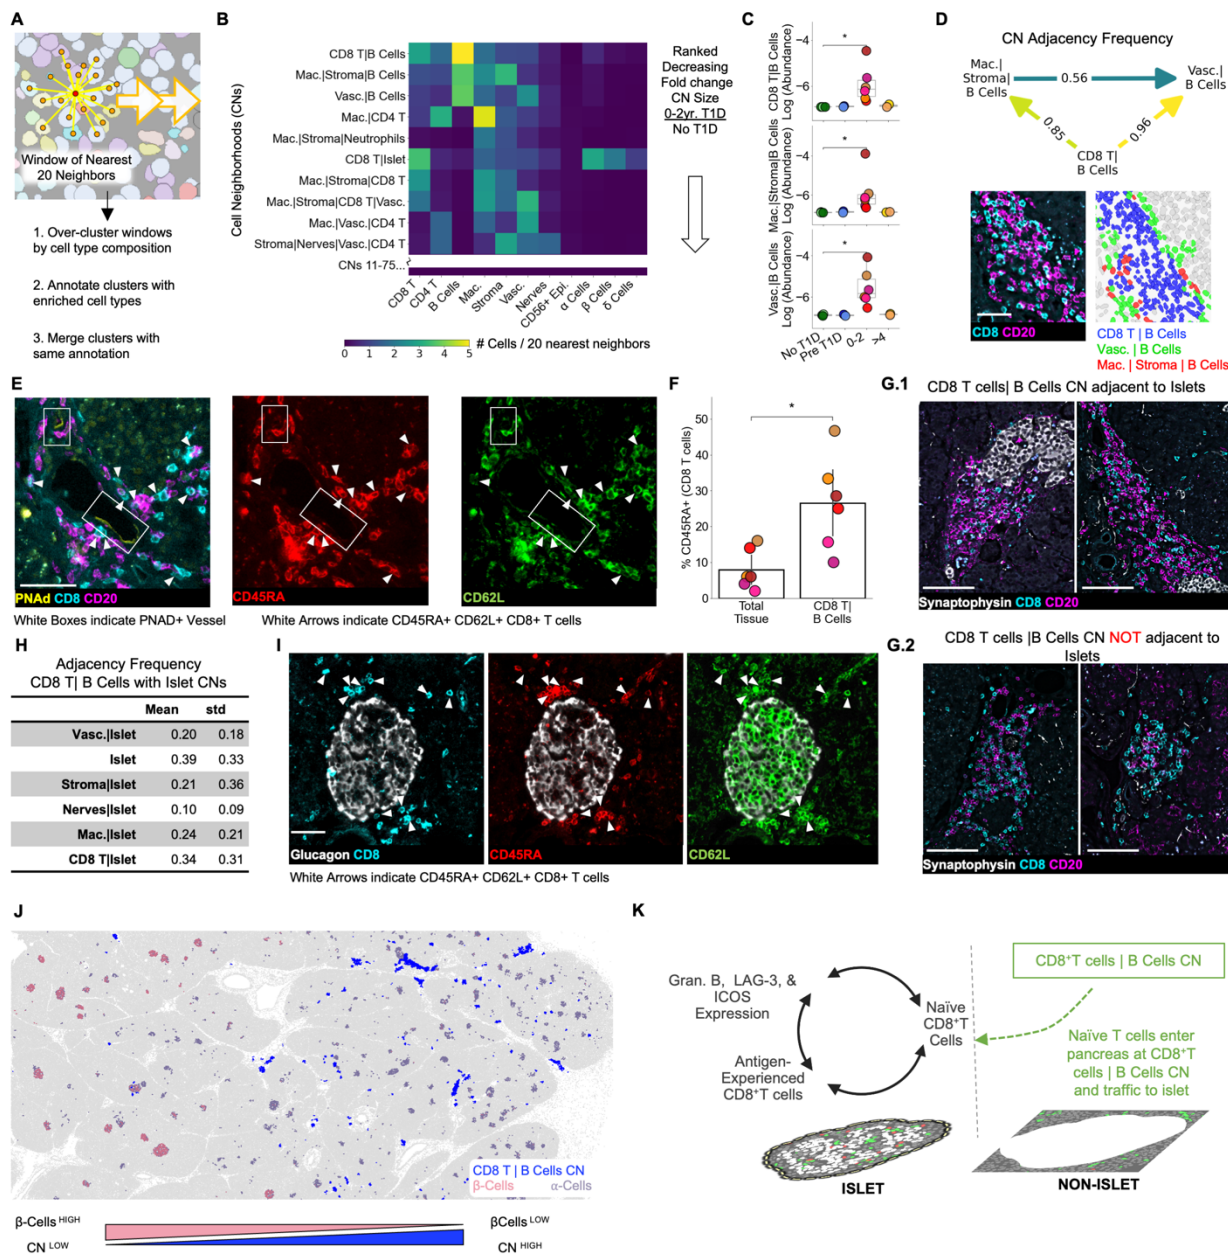

749



750 **Figure 5 Immature tertiary lymphoid structures far from islets are potential staging areas for**  
751 **islet-destined CD8<sup>+</sup>T cells**

752 Figure 5.A Schematic of algorithm for identifying CNs. Red point indicates index cell for the CN.  
753 Orange points indicate the nearest neighbors of the index cell. Windows are collected for each  
754 cell in the dataset (indicated by orange arrows).

755 Figure 5.B Cell-type compositions of the top CNs organized in decreasing order of the fold  
756 increase in abundance in T1D vs. non-T1D samples. Each column in the heatmap indicates the  
757 mean density of that cell type in the 20 nearest spatial neighbors of cells assigned to the CN  
758 designated for that row. Abundance was calculated as the number of cells assigned to the given  
759 CN divided by the number of acinar cells. Abbreviations: Vasc.: vasculature; Mac.: macrophages;  
760 Lym.: lymphatics. Neu.: neutrophils; CD8 T: CD8<sup>+</sup>T cells; CD4 T: CD4<sup>+</sup>T cells. Endocrine cell types  
761 were merged during CN annotation and are labeled “Islet”.

762 Figure 5.C Mean abundances of the CD8<sup>+</sup>T cell and B cell CNs per donor. Abundance was  
763 calculated as the number of cells assigned to the given CN divided by the number of acinar cells.  
764 Significance was determined using the Mann-Whitney U test (\* p<0.05, \*\* p<0.01, \*\*\* p<0.001).  
765 No adjustment for multiple hypothesis testing was applied.

766 Figure 5.D Top: Adjacency frequencies of (CD8<sup>+</sup>T cells| B Cell CN) with (Macrophage|Stroma|B  
767 Cells) and (Vasculature| B Cells) CNs. The adjacency frequency was calculated as the number of  
768 instances of the source CN adjacent to the destination CN divided by the total number of  
769 instances of the source CN. Bottom Left: Raw image of a representative assembly of the three  
770 CNs (CD8<sup>+</sup>T cells| B Cell CN), (Macrophage|Stroma|B Cells), and (Vasculature| B Cells) displaying  
771 CD8 and CD20 staining. Bottom Right: The same assembly as to the left colored by CN. Scale bar  
772 indicates 50µm).

773 Figure 5.E Representative images of co-localization of PNA<sup>+</sup> endothelium and CD45RA<sup>+</sup> CD62L<sup>+</sup>  
774 CD8<sup>+</sup>T cells located in the (CD8<sup>+</sup>T cells| B Cells) CN. Scale bar indicates 50µm.

775 Figure 5.F Enrichment of CD45RA expression on CD8<sup>+</sup>T cells located in (CD8<sup>+</sup>T cell | B cell) CN  
776 relative to CD8<sup>+</sup>T cells throughout the tissue. Significance was determined with a Wilcoxon  
777 signed-rank test (\* p<0.05, \*\* p<0.01, \*\*\* p<0.001).

778 Figure 5.G Representative images in case 6209 of (CD8<sup>+</sup>T cells| B Cells) instances adjacent to islets  
779 (G.1) and not adjacent to islets (G.2). Scale bars indicate 200µm.

780 Figure 5.H Quantification of the adjacency frequencies between the (CD8<sup>+</sup>T cells| B Cells) CN and  
781 CNs rich in endocrine cells (i.e “Islet CNs”). Mean, std: mean and standard deviation adjacency  
782 frequency across T1D donors. Abbreviations: Vasc.: vasculature; Mac.: macrophage.

783 Figure 5.I Representative images in case 6209 of islet-associated CD45RA<sup>+</sup> CD62L<sup>+</sup> CD8<sup>+</sup>T cells.  
784 Scale bar indicates 50 µm.

785 Figure 5.J Image in case 6209 showing the spatial distribution of the (CD8<sup>+</sup>T cells| B cells) CN  
786 instances relative to islets and the enrichment of (CD8<sup>+</sup>T cells| B cells) CN instances in areas of  
787 the pancreas with islets lacking β-Cells.

788 Figure 5.K Proposed model of coordinated T cell stimulation in islets in T1D rejuvenated by naïve  
789 T cells that enter the pancreas at the (CD8<sup>+</sup>T cells|B Cells) CN outside islets.

790

791

792

793

794



# 1 Supplemental Information

2

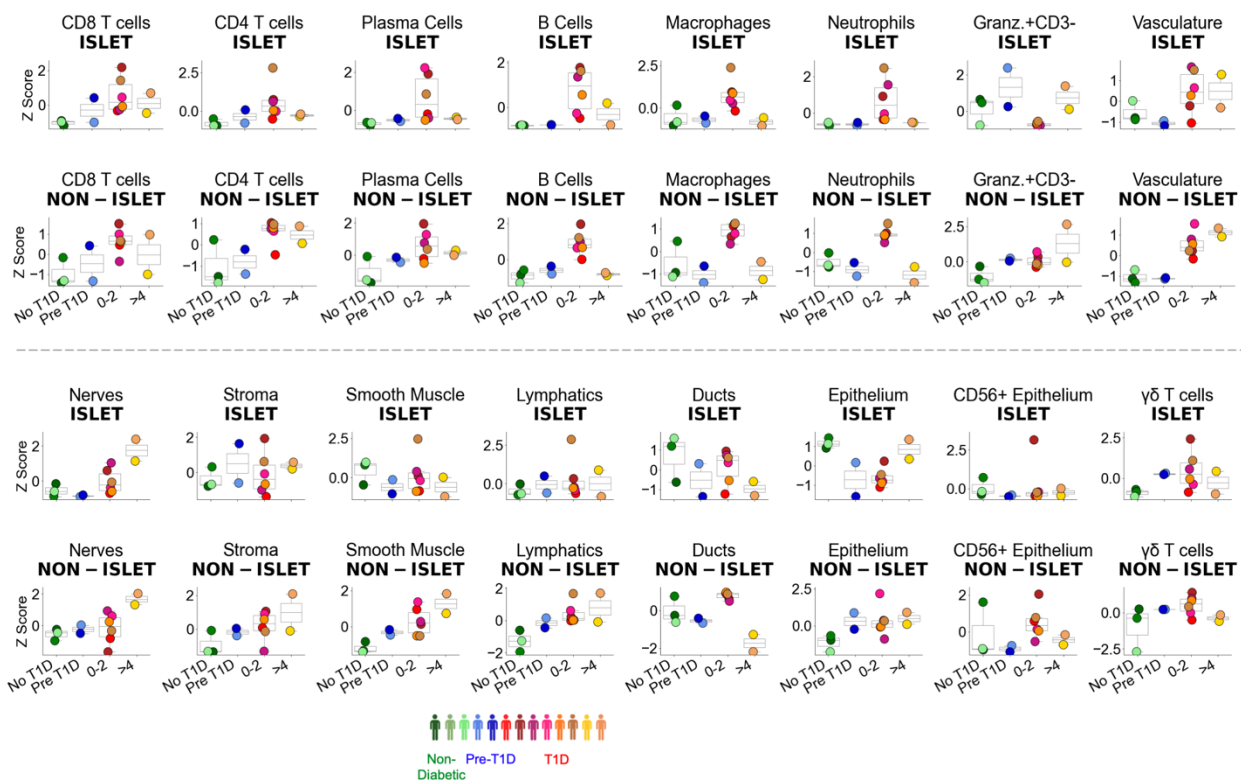

3

## 4 Supplemental Figure 1 Related to Figure 1.

5 Supplemental Figure 1.A Changes in cellular abundance in Islet (top) and non-islet (bottom)  
6 regions. The Y-axis corresponds to the number of the given cell type / number of endocrine  
7 cells in the top row and the number of a given cell type / number of acinar cells in the bottom  
8 row in each donor. These frequencies were then z-normalized across donors.

9

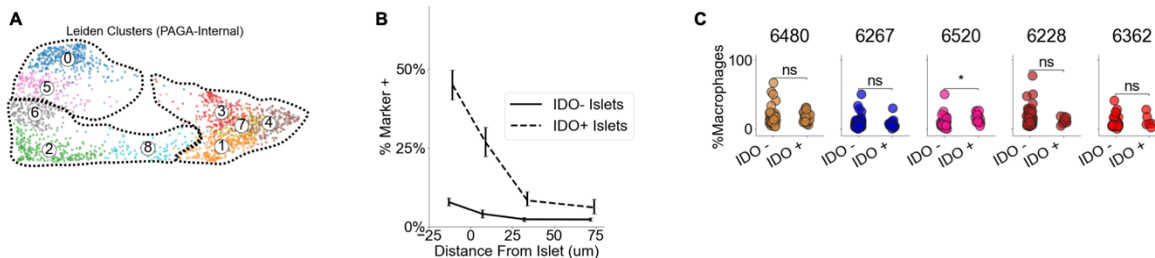

10

## 11 Supplemental Figure 2 Related to Figure 2.

12 Supplemental Figure 2.A Leiden clustering computed by PAGA algorithm internally. Clusters 0  
13 and 5 were assigned to the 'Healthy' group. Clusters 6, 2, and 8 were assigned to the "Inflamed"  
14 group. Clusters 1,3,7, and 4 were assigned to the "β-Cell Depleted" group.

15 Supplemental Figure 2.B Frequency of IDO on vasculature at different distances from islets.  
 16 Dashed line indicates the frequency in and around islets where IDO<sup>+</sup> was detected in islet  
 17 vasculature (n=84) as in Figure 2.H. Solid line indicates the frequency in and around Inflamed  
 18 Islets in which IDO was absent (n=267). Error bars indicate 95% confidence intervals obtained  
 19 by iteratively calculating the marker frequency in re-sampled islets with replacement (n=200)

20 Supplemental Figure 2.C Macrophage abundance in IDO<sup>+</sup> and IDO<sup>-</sup> islets. Same as Figure 2.I.  
 21 Asterisks in figure indicate significance within each donor. For combined donors, significance  
 22 was determined with a mixed-effect linear model, p = 0.72 (Satterthwaites's method lmerTest R  
 23 package).

24

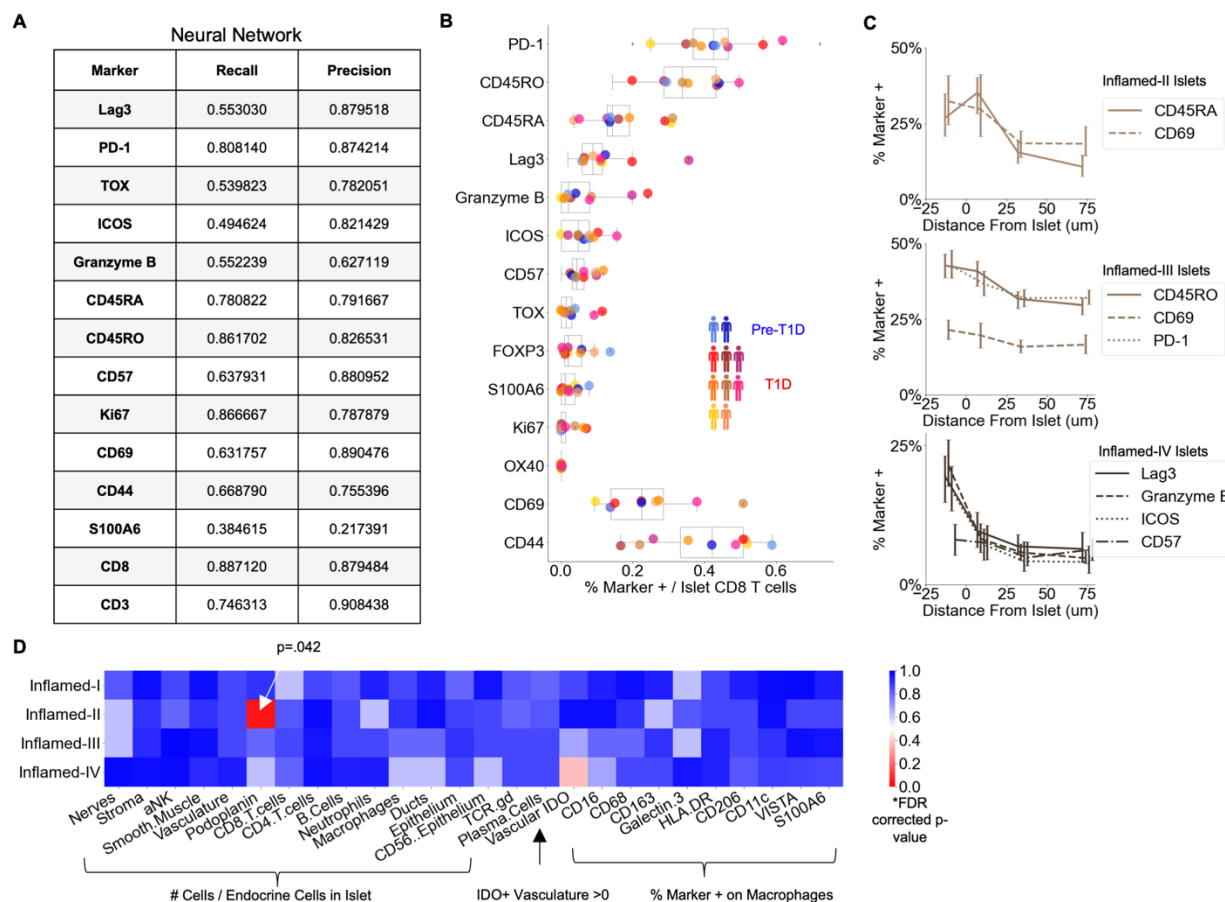

25

26 **Supplemental Figure 3      Related to Figure 3**

27 Supplemental Figure 3.A Validation of neural network for detecting expression of weak  
 28 antigens. Left: Recall and Precision for the automated gating scheme (see Methods). Right:  
 29 Recall and Precision for the neural network. Both tables were computed using cells in the "Test"  
 30 dataset unseen by the neural network.

31 Supplemental Figure 3.B Frequency of functional markers on CD8<sup>+</sup>T cells inside islets. Colors  
 32 correspond to donor. Only Pre-T1D and T1D donors are displayed.

33 Supplemental Figure 3.C Frequency of functional markers on CD8<sup>+</sup>T cells at different distances  
 34 from islets. Error bars indicate 95% confidence intervals obtained by iteratively calculating the  
 35 marker frequency in re-sampled islets with replacement (n=200).

36 Supplemental Figure 3.D Association of islet features with Inflamed-I through -IV. For each  
 37 feature (columns), a mixed-level model adjusting for donor was fit in a one-vs-all design and the  
 38 p-value was determined using Satterthwaites's method in lmerTest R package. Values in the  
 39 heatmap were corrected for multiple hypotheses using the Benjamini, Hochberg method.

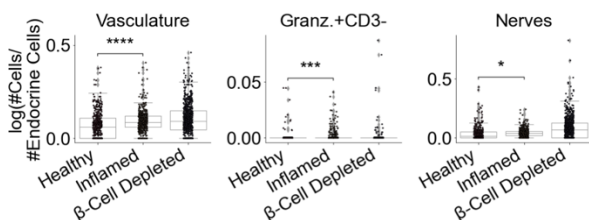

40

41 **Supplemental Figure 4 Related to Figure 4**

42 Supplemental Figure 4.A Changes in cell types identified by HLM in insulitis. Each point  
 43 represents an islet. Islets are grouped according to the pseudotime analysis from Figure 2. The  
 44 y-axis corresponds to the log-transformed values for the number of the given cell type /  
 45 number of endocrine cells. Significance was determined using the t-test (\* p<0.05, \*\* p<0.01,  
 46 \*\*\* p<0.001). No adjustment for multiple hypothesis testing was applied.

47

| CaseID | Donor Type      | Age (years) | Diabetes Duration (years) | Cause of Death                  | Sex    | Ethnicity | BMI   | nPOD RRID    |
|--------|-----------------|-------------|---------------------------|---------------------------------|--------|-----------|-------|--------------|
| 6267   | Autoab positive | 23          | NA                        | Anoxia                          | Female | Caucasian | 16.59 | SAMN15879321 |
| 6314   | Autoab positive | 21          | NA                        | Head Trauma                     | Male   | Caucasian | 23.8  | SAMN15879368 |
| 6520   | T1D             | 21.61       | 0                         | Cerebrovascular/                | Male   | Caucasian | 29.3  | SAMN18053203 |
| 6362   | T1D             | 24.9        | 0                         | Head Trauma                     | Male   | Caucasian | 28.5  | SAMN15879415 |
| 6228   | T1D             | 13          | 0                         | Anoxia                          | Male   | Caucasian | 17.4  | SAMN15879284 |
| 6209   | T1D             | 5           | 0.25                      | Cerebral edema secondary to DKA | Female | Caucasian | 15.9  | SAMN15879265 |
| 6371   | T1D             | 12.5        | 2                         | Cerebral edema                  | Female | Caucasian | 16.6  | SAMN15879424 |
| 6480   | T1D             | 17.18       | 2                         | DKA                             | Male   | Caucasian | 27.1  | SAMN15879533 |
| 6195   | T1D             | 19.3        | 5                         | Head Trauma                     | Male   | Caucasian | 23.7  | SAMN15879251 |
| 6323   | T1D             | 22          | 6                         | Anoxia                          | Female | Caucasian | 24.7  | SAMN15879377 |
| 6389   | No diabetes     | 18.6        | NA                        | Head Trauma                     | Male   | Caucasian | 20.9  | SAMN15879442 |
| 6179   | No diabetes     | 20          | NA                        | Head Trauma                     | Female | Caucasian | 20.7  | SAMN15879235 |
| 6386   | No diabetes     | 14          | NA                        | Head Trauma                     | Male   | Caucasian | 23.9  | SAMN15879439 |

48

49 **Supplemental Table 1: nPOD Case Information**

50

51

| Both             | "All" UMAP     | "Immune" UMAP | Endocrine Cells | Un-used **** |
|------------------|----------------|---------------|-----------------|--------------|
| Channel 2 Blank* | alphaSMA       | VISTA         | Glucagon        | CD44         |
| Channel 3 Blank* | Synaptophysin  | TCR g/d       | Insulin         | CD45RA       |
| Channel 4 Blank* | Podoplanin     | MPO           | Proinsulin      | CD45RO       |
| S100A6           | PD-L1 ***      | HLA-DR        | Somatostatin    | CollIV       |
| Hoechst**        | NaKATPase      | FOXP3         |                 | HABP         |
| Granzyme B       | MUC-1          | CD8           |                 | HLA-ABC      |
| Galectin-3       | Draq 5         | CD69          |                 | ICOS         |
| CD68             | Cytokeratin    | CD4           |                 | IDO          |
| CD57             | Chromogranin A | CD206         |                 | Ki67         |
| CD56             | CD31           | CD16          |                 | Lag3         |
| CD45             |                | CD11c         |                 | OX40         |
| CD3              |                | BCL-2         |                 | PD-1         |
| CD20             |                |               |                 | TOX          |
| CD163            |                |               |                 |              |
| CD15             |                |               |                 |              |
| CD138            |                |               |                 |              |

52  
53 **Supplemental Table 2: Markers used for cell-type identification.** Channels in the "Both" column  
54 were used for clustering all cells and specifying immune cells. Channels in the "All" column were  
55 only used for clustering all cells and the UMAP in Figure 1.B. Channels in "Immune" columns were  
56 only used for sub-clustering immune cells and the UMAP in Figure 1.C. Channels in "Endocrine"  
57 column were used for sub-clustering endocrine populations. Channels in "Un-used" column were  
58 not included in the clustering or UMAP step because they were either too weak to aid clustering  
59 or were expressed on multiple cell-populations and confounded cell-type identification.

60

|          | AntiBody       | A488  | ExposuresTime | AntiBody      | A555        | ExposuresTime | AntiBody   | A647  | ExposuresTime |
|----------|----------------|-------|---------------|---------------|-------------|---------------|------------|-------|---------------|
| Cycle 1  | CollIV         | 33    | 333           | NaKATPase     | 36          | 100           | HLA-ABC    | 53    | 100           |
| Cycle 2  | blank          | blank | 1000          | blank         | blank       | 1000          | blank      | blank | 1000          |
| Cycle 3  | Ki67           | 6     | 100           | BCL-2         | 46          | 500           | TOX        | 28    | 150           |
| Cycle 4  | Chromogranin A | 43    | 16            | empty         |             | 1             | FOXP3      | 61    | 1000          |
| Cycle 5  | Proinsulin     | 63    | 40            | Galectin-3    | 60          | 166           | empty      |       | 1             |
| Cycle 6  | Glucagon       | 24    | 50            | Podoplanin    | 32          | 500           | Insulin    | 30    | 200           |
| Cycle 7  | CD8            | 8     | 125           | CD31          | 68          | 100           | Lag3       | 42    | 500           |
| Cycle 8  | CD15           | 14    | 40            | CD45RA        | 7           | 333           | PD-1       | 23    | 500           |
| Cycle 9  | MPO            | 51    | 117           | CD69          | 52          | 500           | PD-L1      | 11    | 500           |
| Cycle 10 | S100A6         | 70    | 500           | empty         |             | 1             | CD3        | 77    | 500           |
| Cycle 11 | MUC-1          | 21    | 33            | CD20          | 48          | 167           | CD4        | 20    | 500           |
| Cycle 12 | Cytokeratin    | 67    | 100           | CD16          | 15          | 250           | CD11c      | 49    | 500           |
| Cycle 13 | alphaSma       | 69    | 50            | CD163         | 45          | 100           | empty      |       | 1             |
| Cycle 14 | CD57           | 57    | 300           | Somatostatin  | 2           | 100           | CD56       | 29    | 333           |
| Cycle 15 | CD44           | 44    | 250           | CD206         | 55          | 400           | CD45RO     | 3     | 500           |
| Cycle 16 | TCR g/d        | 72    | 1000          | CD45          | 56          | 250           | ICOS       | 41    | 500           |
| Cycle 17 | empty          |       | 1             | Synaptophysin | 26          | 250           | Granzyme B | 81    | 100           |
| Cycle 18 | empty          |       | 1             | HLA-DR        | 65          | 250           | OX40       | 66    | 400           |
| Cycle 19 | empty          |       | 1             | VISTA         | 79          | 500           | CD138      | 76    | 200           |
| Cycle 20 | empty          |       | 1             | IDO           | 59          | 2500          | CD68       | 5     | 100           |
| Cycle 21 | empty          |       | 1             | HABP          | 1/100 StrPE | 13            | Draq 5     |       | 115           |

61

62 **Supplemental Table 3: CODEX Experiment Details**

63

| Marker                                         | Clone                           | Vendor          | Identifier  |
|------------------------------------------------|---------------------------------|-----------------|-------------|
| CollIV                                         | poly                            | Abcam           | ab6586      |
| Ki67                                           | B56                             | BD              | 556003      |
| Chromogranin A                                 | .K2H10 + PHE5 + CGA/41-         | Novus           | NBP2-34674  |
| Proinsulin                                     | 3A1                             | Thermo          | MA122710    |
| Glucagon                                       | K7bB10                          | Abcam           | ab10988     |
| CD8                                            | C8/144B                         | Santa Cruz      | sc-53212    |
| CD15                                           | MMA                             | BD              | 559045      |
| MPO                                            | poly                            | R&D             | AF3667      |
| S100A6                                         | 7D11                            | Novus           | NB100-1765  |
| MUC-1                                          | 955                             | NSJ Bioreagents | V2372SAF    |
| Cytokeratin                                    | C11                             | Biologend       | 628602      |
| alphaSma                                       | polyclonal                      | abcam           | ab5694      |
| CD57                                           | HCD57                           | Biologend       | 359602      |
| CD44                                           | IM-7                            | Biologend       | 103002      |
| TCR g/d                                        | H-41                            | Santa Cruz      | sc-100289   |
| NaKATPase                                      | EP1845Y                         | Abcam           | ab167390    |
| BCL-2                                          | 124                             | Cell Marque     | custom      |
| Galectin-3                                     | A3A12                           | Thermo          | MA1940      |
| Podoplanin                                     | NC-08                           | Biologend       | 916606      |
| CD31                                           | C31.3 + C31.7 + C31.10          | Novus Bio       | NBP2-47785  |
| CD45RA                                         | HI100                           | Biologend       | 555486      |
| CD69                                           | poly (AF2359)                   | Novus           | AF2359      |
| CD20                                           | rIGEL/773                       | Novus           | NBP2-54591  |
| CD16                                           | D1N9L                           | CST             | custom      |
| CD163                                          | EDHu-1                          | Novus           | NB110-40686 |
| Somatostatin                                   | 7G5                             | Novus           | NBP2-37447  |
| CD206                                          | poly                            | R&D             | AF2534      |
| CD45                                           | 2B11 + PD7/26                   | Novus           | NBP2-34528  |
| Synaptophysin                                  | 7H12                            | Novus           | NBP1-47483  |
| HLA-DR                                         | EPR3692                         | abcam           | ab215985    |
| VISTA                                          | D1L2G                           | CST             | custom      |
| IDO                                            | D5J4E                           | CST             | custom      |
| biotinylated Hyaluronan Binding Protein (HABP) | Bollyky Lab Stanford University |                 | custom      |
| HLA-ABC                                        | EMR8-5                          | BD              | 565292      |
| TOX                                            | E6I3Q                           | CST             | custom      |
| FOXP3                                          | 236A/E7                         | Invitrogen      | 14-4777-80  |
| Insulin                                        | K36AC10                         | Sigma           | SAB4200691  |
| Lag3                                           | D2G40                           | CST             | custom      |
| PD-1                                           | D4W2J                           | CST             | custom      |
| PD-L1                                          | E1L3N                           | CST             | custom      |
| CD3                                            | D7A6E                           | CST             | custom      |
| CD4                                            | EPR6855                         | Abcam           | ab181724    |
| CD11c                                          | EP1347Y                         | AbCam           | ab216655    |
| CD56                                           | MRQ-42                          | Cell Marque     | custom      |
| CD45RO                                         | UCH-L1                          | Santa Cruz      | sc-1183     |
| ICOS                                           | D1K2T                           | CST             | custom      |
| Granzyme B                                     | EPR20129-217                    | Abcam           | ab219803    |
| OX40                                           | Ber-ACT35                       | Biologend       | Ber-ACT35   |
| CD138                                          | B-A38                           | Invitrogen      | MA1-10091   |
| CD68                                           | D4B9C                           | CST             | 916104      |
| PNAD                                           | MECA-79                         | Biologend       | 120801      |
| CD62L                                          | B-8                             | SCBT            | QT 48070    |

64  
65  
66

#### Supplemental Table 4: Antibody Clone Details



## 795 References

- 796 Abhishek Dutta and Andrew Zisserman. 2019. "The VIA Annotation Software for Images, Audio  
797 and Video." In . MM '19. Nice, France: ACM. <https://doi.org/10.1145/3343031.3350535>.
- 798 Agrawal, Smriti M., Jacqueline Williamson, Ritu Sharma, Hania Kebir, Kamala Patel, Alexandre  
799 Prat, and V. Wee Yong. 2013. "Extracellular Matrix Metalloproteinase Inducer Shows  
800 Active Perivascular Cuffs in Multiple Sclerosis." *Brain* 136 (6): 1760–77.  
801 <https://doi.org/10.1093/brain/awt093>.
- 802 Alexander, Angela M., Megan Crawford, Suzanne Bertera, William A. Rudert, Osamu Takikawa,  
803 Paul D. Robbins, and Massimo Trucco. 2002. "Indoleamine 2,3-Dioxygenase Expression  
804 in Transplanted NOD Islets Prolongs Graft Survival After Adoptive Transfer of  
805 Diabetogenic Splenocytes." *Diabetes* 51 (2): 356–65.  
806 <https://doi.org/10.2337/diabetes.51.2.356>.
- 807 Arif, Sefina, Pia Leete, Vy Nguyen, Katherine Marks, Nurhanani Mohamed Nor, Megan  
808 Estorninho, Deborah Kronenberg-Versteeg, et al. 2014. "Blood and Islet Phenotypes  
809 Indicate Immunological Heterogeneity in Type 1 Diabetes." *Diabetes* 63 (11): 3835–45.  
810 <https://doi.org/10.2337/db14-0365>.
- 811 Bates, Douglas, Martin Mächler, Ben Bolker, and Steve Walker. 2015. "Fitting Linear Mixed-  
812 Effects Models Using Lme4." *Journal of Statistical Software* 67 (October): 1–48.  
813 <https://doi.org/10.18637/jss.v067.i01>.
- 814 Bender, Christine, Teresa Rodriguez-Calvo, Natalie Amirian, Ken T. Coppieters, and Matthias G.  
815 von Herrath. 2020. "The Healthy Exocrine Pancreas Contains Preproinsulin-Specific CD8  
816 T Cells That Attack Islets in Type 1 Diabetes." *Science Advances* 6 (42): eabc5586.  
817 <https://doi.org/10.1126/sciadv.abc5586>.
- 818 Bhate, Salil S., Graham L. Barlow, Christian M. Schürch, and Garry P. Nolan. 2021. "Tissue  
819 Schematics Map the Specialization of Immune Tissue Motifs and Their Appropriation by  
820 Tumors." *Cell Systems*, October. <https://doi.org/10.1016/j.cels.2021.09.012>.
- 821 Black, Sarah, Darci Phillips, John W. Hickey, Julia Kennedy-Darling, Vishal G. Venkataraman,  
822 Nikolay Samusik, Yury Goltsev, Christian M. Schürch, and Garry P. Nolan. 2021. "CODEX  
823 Multiplexed Tissue Imaging with DNA-Conjugated Antibodies." *Nature Protocols* 16 (8):  
824 3802–35. <https://doi.org/10.1038/s41596-021-00556-8>.
- 825 Bluestone, Jeffrey A., Jane H. Buckner, and Kevan C. Herold. 2021. "Immunotherapy: Building a  
826 Bridge to a Cure for Type 1 Diabetes." *Science* 373 (6554): 510–16.  
827 <https://doi.org/10.1126/science.abh1654>.
- 828 Campbell-Thompson, Martha, Teresa Rodriguez-Calvo, and Manuela Battaglia. 2015.  
829 "Abnormalities of the Exocrine Pancreas in Type 1 Diabetes." *Current Diabetes Reports*  
830 15 (10): 79. <https://doi.org/10.1007/s11892-015-0653-y>.
- 831 Campbell-Thompson, Martha, Clive Wasserfall, John Kaddis, Anastasia Albanese-O'Neill,  
832 Teodora Staeva, Concepcion Nierras, Jayne Moraski, et al. 2012. "Network for  
833 Pancreatic Organ Donors with Diabetes (NPOD): Developing a Tissue Biobank for Type 1  
834 Diabetes." *Diabetes/Metabolism Research and Reviews* 28 (7): 608–17.  
835 <https://doi.org/10.1002/dmrr.2316>.
- 836 Castro-Gutierrez, Roberto, Aimon Alkanani, Clayton E. Mathews, Aaron Michels, and Holger A.  
837 Russ. 2021. "Protecting Stem Cell Derived Pancreatic Beta-Like Cells From Diabetogenic

- 838 T Cell Recognition." *Frontiers in Endocrinology* 12.  
839 <https://www.frontiersin.org/articles/10.3389/fendo.2021.707881>.
- 840 Christoffersson, Gustaf, Sowbarnika S. Ratliff, and Matthias G. von Herrath. 2020. "Interference  
841 with Pancreatic Sympathetic Signaling Halts the Onset of Diabetes in Mice." *Science*  
842 *Advances* 6 (35): eabb2878. <https://doi.org/10.1126/sciadv.abb2878>.
- 843 Dalmas, Elise, Frank M. Lehmann, Erez Dror, Stephan Wueest, Constanze Thienel, Marcela  
844 Borsigova, Marc Stawiski, et al. 2017. "Interleukin-33-Activated Islet-Resident Innate  
845 Lymphoid Cells Promote Insulin Secretion through Myeloid Cell Retinoic Acid  
846 Production." *Immunity* 47 (5): 928-942.e7.  
847 <https://doi.org/10.1016/j.immuni.2017.10.015>.
- 848 Damond, Nicolas, Stefanie Engler, Vito R. T. Zanotelli, Denis Schapiro, Clive H. Wasserfall, Irina  
849 Kusmartseva, Harry S. Nick, et al. 2019. "A Map of Human Type 1 Diabetes Progression  
850 by Imaging Mass Cytometry." *Cell Metabolism* 29 (3): 755-768.e5.  
851 <https://doi.org/10.1016/j.cmet.2018.11.014>.
- 852 Diggins, Kirsten E., Elisavet Serti, Virginia Muir, Mario Rosasco, TingTing Lu, Elisa Balmas, Gerald  
853 Nepom, S. Alice Long, and Peter S. Linsley. 2021. "Exhausted-like CD8<sup>+</sup> T Cell Phenotypes  
854 Linked to C-Peptide Preservation in Alefacept-Treated T1D Subjects." *JCI Insight* 6 (3).  
855 <https://doi.org/10.1172/jci.insight.142680>.
- 856 Fasolino, Maria, Gregory W. Schwartz, Abhijeet R. Patil, Aanchal Mongia, Maria L. Golson, Yue J.  
857 Wang, Ashleigh Morgan, et al. 2022. "Single-Cell Multi-Omics Analysis of Human  
858 Pancreatic Islets Reveals Novel Cellular States in Type 1 Diabetes." *Nature Metabolism* 4  
859 (2): 284–99. <https://doi.org/10.1038/s42255-022-00531-x>.
- 860 Gelman, Andrew, John B Carlin, Hal S Stern, David B Dunson, Aki Vehtari, and Donald B Rubin.  
861 n.d. "Bayesian Data Analysis Third Edition (with Errors Fixed as of 15 February 2021),"  
862 677.
- 863 Gepts, Willy. 1965. "Pathologic Anatomy of the Pancreas in Juvenile Diabetes Mellitus."  
864 *Diabetes* 14 (10): 619–33. <https://doi.org/10.2337/diab.14.10.619>.
- 865 Goltsev, Yury, Nikolay Samusik, Julia Kennedy-Darling, Salil Bhate, Matthew Hale, Gustavo  
866 Vazquez, Sarah Black, and Garry P. Nolan. 2018. "Deep Profiling of Mouse Splenic  
867 Architecture with CODEX Multiplexed Imaging." *Cell* 174 (4): 968-981.e15.  
868 <https://doi.org/10.1016/j.cell.2018.07.010>.
- 869 Gregory, Gabriel A., Thomas I. G. Robinson, Sarah E. Linklater, Fei Wang, Stephen Colagiuri,  
870 Carine de Beaufort, Kim C. Donaghue, et al. 2022. "Global Incidence, Prevalence, and  
871 Mortality of Type 1 Diabetes in 2021 with Projection to 2040: A Modelling Study." *The*  
872 *Lancet Diabetes & Endocrinology* 10 (10): 741–60. [https://doi.org/10.1016/S2213-8587\(22\)00218-2](https://doi.org/10.1016/S2213-8587(22)00218-2).
- 873
- 874 Herold, Kevan C., Brian N. Bundy, S. Alice Long, Jeffrey A. Bluestone, Linda A. DiMeglio,  
875 Matthew J. Dufort, Stephen E. Gitelman, et al. 2019. "An Anti-CD3 Antibody,  
876 Teplizumab, in Relatives at Risk for Type 1 Diabetes." *New England Journal of Medicine*  
877 381 (7): 603–13. <https://doi.org/10.1056/NEJMoa1902226>.
- 878 Herold, Kevan C., Stephen E. Gitelman, Mario R. Ehlers, Peter A. Gottlieb, Carla J. Greenbaum,  
879 William Hagopian, Karen D. Boyle, et al. 2013. "Teplizumab (Anti-CD3 MAb) Treatment  
880 Preserves C-Peptide Responses in Patients With New-Onset Type 1 Diabetes in a  
881 Randomized Controlled Trial: Metabolic and Immunologic Features at Baseline Identify a

- 882 Subgroup of Responders." *Diabetes* 62 (11): 3766–74. <https://doi.org/10.2337/db13->  
883 0345.
- 884 Hickey, John W., Yuqi Tan, Garry P. Nolan, and Yury Goltsev. 2021. "Strategies for Accurate Cell  
885 Type Identification in CODEX Multiplexed Imaging Data." *Frontiers in Immunology* 12.  
886 <https://www.frontiersin.org/article/10.3389/fimmu.2021.727626>.
- 887 Hirsch, James S. 2023. "FDA Approves Teplizumab: A Milestone in Type 1 Diabetes." *The Lancet*  
888 *Diabetes & Endocrinology* 11 (1): 18. [https://doi.org/10.1016/S2213-8587\(22\)00351-5](https://doi.org/10.1016/S2213-8587(22)00351-5).
- 889 In't Veld, Peter. 2011. "Insulinitis in Human Type 1 Diabetes: The Quest for an Elusive Lesion."  
890 *Islets* 3 (4): 131–38. <https://doi.org/10.4161/isl.3.4.15728>.
- 891 Jerby-Arnon, Livnat, and Aviv Regev. 2022. "DIALOGUE Maps Multicellular Programs in Tissue  
892 from Single-Cell or Spatial Transcriptomics Data." *Nature Biotechnology* 40 (10): 1467–  
893 77. <https://doi.org/10.1038/s41587-022-01288-0>.
- 894 Kennedy-Darling, Julia, Salil S. Bhate, John W. Hickey, Sarah Black, Graham L. Barlow, Gustavo  
895 Vazquez, Vishal G. Venkataraman, et al. 2021. "Highly Multiplexed Tissue Imaging  
896 Using Repeated Oligonucleotide Exchange Reaction." *European Journal of Immunology*  
897 51 (5): 1262–77. <https://doi.org/10.1002/eji.202048891>.
- 898 Korpos, Éva, Nadir Kadri, Reinhild Kappelhoff, Jeannine Wegner, Christopher M. Overall,  
899 Ekkehard Weber, Dan Holmberg, Susanna Cardell, and Lydia Sorokin. 2013. "The Peri-  
900 Islet Basement Membrane, a Barrier to Infiltrating Leukocytes in Type 1 Diabetes in  
901 Mouse and Human." *Diabetes* 62 (2): 531–42. <https://doi.org/10.2337/db12-0432>.
- 902 Korpos, Éva, Nadir Kadri, Sophie Loismann, Clais R. Findeisen, Frank Arfuso, George W. Burke,  
903 Sarah J. Richardson, et al. 2021. "Identification and Characterisation of Tertiary  
904 Lymphoid Organs in Human Type 1 Diabetes." *Diabetologia* 64 (7): 1626–41.  
905 <https://doi.org/10.1007/s00125-021-05453-z>.
- 906 Krogvold, Lars, Bjørn Edwin, Trond Buanes, Johnny Ludvigsson, Olle Korsgren, Heikki Hyöty, Gun  
907 Frisk, Kristian F. Hanssen, and Knut Dahl-Jørgensen. 2014. "Pancreatic Biopsy by Minimal  
908 Tail Resection in Live Adult Patients at the Onset of Type 1 Diabetes: Experiences from  
909 the DiViD Study." *Diabetologia* 57 (4): 841–43. <https://doi.org/10.1007/s00125-013->  
910 3155-y.
- 911 Kuric, Enida, Peter Seiron, Lars Krogvold, Bjørn Edwin, Trond Buanes, Kristian F. Hanssen, Oskar  
912 Skog, Knut Dahl-Jørgensen, and Olle Korsgren. 2017. "Demonstration of Tissue Resident  
913 Memory CD8 T Cells in Insulitic Lesions in Adult Patients with Recent-Onset Type 1  
914 Diabetes." *The American Journal of Pathology* 187 (3): 581–88.  
915 <https://doi.org/10.1016/j.ajpath.2016.11.002>.
- 916 Kuznetsova, Alexandra, Per B. Brockhoff, and Rune H. B. Christensen. 2017. "LmerTest Package:  
917 Tests in Linear Mixed Effects Models." *Journal of Statistical Software* 82 (December): 1–  
918 26. <https://doi.org/10.18637/jss.v082.i13>.
- 919 Lee, Michael Y., Jacob S. Bedia, Salil S. Bhate, Graham L. Barlow, Darci Phillips, Wendy J. Fantl,  
920 Garry P. Nolan, and Christian M. Schürch. 2022. "CellSeg: A Robust, Pre-Trained Nucleus  
921 Segmentation and Pixel Quantification Software for Highly Multiplexed Fluorescence  
922 Images." *BMC Bioinformatics* 23 (1): 46. <https://doi.org/10.1186/s12859-022-04570-9>.
- 923 Leete, Pia, Abby Willcox, Lars Krogvold, Knut Dahl-Jørgensen, Alan K. Foulis, Sarah J. Richardson,  
924 and Noel G. Morgan. 2016. "Differential Insulitic Profiles Determine the Extent of  $\beta$ -Cell

- 925 Destruction and the Age at Onset of Type 1 Diabetes." *Diabetes* 65 (5): 1362–69.  
926 <https://doi.org/10.2337/db15-1615>.
- 927 Martino, Luisa, Matilde Masini, Marco Bugliani, Lorella Marselli, Mara Suleiman, Ugo Boggi,  
928 Tatiane C. Nogueira, et al. 2015. "Mast Cells Infiltrate Pancreatic Islets in Human Type 1  
929 Diabetes." *Diabetologia* 58 (11): 2554–62. <https://doi.org/10.1007/s00125-015-3734-1>.
- 930 Munn, David H., and Andrew L. Mellor. 2016. "IDO in the Tumor Microenvironment:  
931 Inflammation, Counter-Regulation, and Tolerance." *Trends in Immunology* 37 (3): 193–  
932 207. <https://doi.org/10.1016/j.it.2016.01.002>.
- 933 Orban, Tihamer, Brian Bundy, Dorothy J. Becker, Linda A. DiMeglio, Stephen E. Gitelman, Robin  
934 Goland, Peter A. Gottlieb, et al. 2011. "Co-Stimulation Modulation with Abatacept in  
935 Patients with Recent-Onset Type 1 Diabetes: A Randomised, Double-Blind, Placebo-  
936 Controlled Trial." *Lancet (London, England)* 378 (9789): 412–19.  
937 [https://doi.org/10.1016/S0140-6736\(11\)60886-6](https://doi.org/10.1016/S0140-6736(11)60886-6).
- 938 ———. 2014. "Costimulation Modulation With Abatacept in Patients With Recent-Onset Type 1  
939 Diabetes: Follow-up 1 Year After Cessation of Treatment." *Diabetes Care* 37 (4): 1069–  
940 75. <https://doi.org/10.2337/dc13-0604>.
- 941 Osum, Kevin C., Adam L. Burrack, Tijana Martinov, Nathanael L. Sahli, Jason S. Mitchell,  
942 Christopher G. Tucker, Kristen E. Pauken, et al. 2018. "Interferon-Gamma Drives  
943 Programmed Death-Ligand 1 Expression on Islet  $\beta$  Cells to Limit T Cell Function during  
944 Autoimmune Diabetes." *Scientific Reports* 8 (1): 8295. <https://doi.org/10.1038/s41598-018-26471-9>.
- 946 Penaranda, Cristina, Qizhi Tang, Nancy H. Ruddle, and Jeffrey A. Bluestone. 2010. "Prevention  
947 of Diabetes by FTY720-Mediated Stabilization of Peri-Islet Tertiary Lymphoid Organs."  
948 *Diabetes* 59 (6): 1461–68. <https://doi.org/10.2337/db09-1129>.
- 949 Perdigoto, Ana Luisa, Paula Preston-Hurlburt, Pamela Clark, S. Alice Long, Peter S. Linsley,  
950 Kristina M. Harris, Steven E. Gitelman, et al. 2019. "Treatment of Type 1 Diabetes with  
951 Teplizumab: Clinical and Immunological Follow-up after 7 Years from Diagnosis."  
952 *Diabetologia* 62 (4): 655–64. <https://doi.org/10.1007/s00125-018-4786-9>.
- 953 Pescovitz, Mark D., Carla J. Greenbaum, Heidi Krause-Steinrauf, Dorothy J. Becker, Stephen E.  
954 Gitelman, Robin Goland, Peter A. Gottlieb, et al. 2009. "Rituximab, B-Lymphocyte  
955 Depletion, and Preservation of Beta-Cell Function." *New England Journal of Medicine*  
956 361 (22): 2143–52. <https://doi.org/10.1056/NEJMoa0904452>.
- 957 Phillips, Darci, Magdalena Matusiak, Belén Rivero Gutierrez, Salil S. Bhate, Graham L. Barlow,  
958 Sizun Jiang, Janos Demeter, et al. 2021. "Immune Cell Topography Predicts Response to  
959 PD-1 Blockade in Cutaneous T Cell Lymphoma." *Nature Communications* 12 (1): 6726.  
960 <https://doi.org/10.1038/s41467-021-26974-6>.
- 961 Phillips, Darci, Christian M. Schürch, Michael S. Khodadoust, Youn H. Kim, Garry P. Nolan, and  
962 Sizun Jiang. 2021. "Highly Multiplexed Phenotyping of Immunoregulatory Proteins in the  
963 Tumor Microenvironment by CODEX Tissue Imaging." *Frontiers in Immunology* 12:  
964 687673. <https://doi.org/10.3389/fimmu.2021.687673>.
- 965 Pugliese, Alberto, Mingder Yang, Irina Kusmarteva, Tiffany Heiple, Francesco Vendrame, Clive  
966 Wasserfall, Patrick Rowe, et al. 2014. "The Juvenile Diabetes Research Foundation  
967 Network for Pancreatic Organ Donors with Diabetes (NPOD) Program: Goals,



- 968           Operational Model and Emerging Findings.” *Pediatric Diabetes* 15 (1): 1–9.  
969           <https://doi.org/10.1111/pedi.12097>.
- 970 Rodriguez-Calvo, Teresa, Olov Ekwall, Natalie Amirian, Jose Zapardiel-Gonzalo, and Matthias G.  
971 von Herrath. 2014. “Increased Immune Cell Infiltration of the Exocrine Pancreas: A  
972 Possible Contribution to the Pathogenesis of Type 1 Diabetes.” *Diabetes* 63 (11): 3880–  
973 90. <https://doi.org/10.2337/db14-0549>.
- 974 Rovituso, Damiano M., Laura Scheffler, Marie Wunsch, Christoph Kleinschnitz, Sebastian Dörck,  
975 Jochen Ulzheimer, Antonios Bayas, Lawrence Steinman, Süleyman Ergün, and Stefanie  
976 Kuerten. 2016. “CEACAM1 Mediates B Cell Aggregation in Central Nervous System  
977 Autoimmunity.” *Scientific Reports* 6 (July): 29847. <https://doi.org/10.1038/srep29847>.
- 978 Saelens, Wouter, Robrecht Cannoodt, Helena Todorov, and Yvan Saeys. 2019. “A Comparison of  
979 Single-Cell Trajectory Inference Methods.” *Nature Biotechnology* 37 (5): 547–54.  
980 <https://doi.org/10.1038/s41587-019-0071-9>.
- 981 Sainburg, Tim, Leland McInnes, and Timothy Q. Gentner. 2021. “Parametric UMAP Embeddings  
982 for Representation and Semi-Supervised Learning.” arXiv.  
983 <https://doi.org/10.48550/arXiv.2009.12981>.
- 984 Satpathy, Ansuman T., Jeffrey M. Granja, Kathryn E. Yost, Yanyan Qi, Francesca Meschi,  
985 Geoffrey P. McDermott, Brett N. Olsen, et al. 2019. “Massively Parallel Single-Cell  
986 Chromatin Landscapes of Human Immune Cell Development and Intratumoral T Cell  
987 Exhaustion.” *Nature Biotechnology* 37 (8): 925–36. <https://doi.org/10.1038/s41587-019-0206-z>.
- 989 Savinov, Alexei Y., F. Susan Wong, Austin C. Stonebraker, and Alexander V. Chervonsky. 2003.  
990 “Presentation of Antigen by Endothelial Cells and Chemoattraction Are Required for  
991 Homing of Insulin-Specific CD8+ T Cells.” *The Journal of Experimental Medicine* 197 (5):  
992 643–56. <https://doi.org/10.1084/jem.20021378>.
- 993 Schürch, Christian M., Salil S. Bhate, Graham L. Barlow, Darci J. Phillips, Luca Noti, Inti Zlobec,  
994 Pauline Chu, et al. 2020. “Coordinated Cellular Neighborhoods Orchestrate Antitumoral  
995 Immunity at the Colorectal Cancer Invasive Front.” *Cell*, August.  
996 <https://doi.org/10.1016/j.cell.2020.07.005>.
- 997 Shekarian, Tala, Carl P. Zinner, Ewelina M. Bartoszek, Wandrille Duchemin, Anna T.  
998 Wachnowicz, Sabrina Hogan, Manina M. Etter, et al. 2022. “Immunotherapy of  
999 Glioblastoma Explants Induces Interferon- $\gamma$  Responses and Spatial Immune Cell  
1000 Rearrangements in Tumor Center, but Not Periphery.” bioRxiv.  
1001 <https://doi.org/10.1101/2022.01.19.474897>.
- 1002 Wang, Yue J., Daniel Traum, Jonathan Schug, Long Gao, Chengyang Liu, Mark A. Atkinson, Alvin  
1003 C. Powers, et al. 2019. “Multiplexed In Situ Imaging Mass Cytometry Analysis of the  
1004 Human Endocrine Pancreas and Immune System in Type 1 Diabetes.” *Cell Metabolism*  
1005 29 (3): 769–783.e4. <https://doi.org/10.1016/j.cmet.2019.01.003>.
- 1006 Wekerle, Hartmut. 2017. “B Cells in Multiple Sclerosis.” *Autoimmunity* 50 (1): 57–60.  
1007 <https://doi.org/10.1080/08916934.2017.1281914>.
- 1008 Wilcox, Nicholas S, Jinxiu Rui, Matthias Hebrok, and Kevan C Herold. 2016. “Life and Death of  $\beta$   
1009 Cells in Type 1 Diabetes: A Comprehensive Review.” *Journal of Autoimmunity* 71 (July):  
1010 51–58. <https://doi.org/10.1016/j.jaut.2016.02.001>.



- 1011 Wolf, F. Alexander, Fiona K. Hamey, Mireya Plass, Jordi Solana, Joakim S. Dahlin, Berthold  
1012 Göttgens, Nikolaus Rajewsky, Lukas Simon, and Fabian J. Theis. 2019. “PAGA: Graph  
1013 Abstraction Reconciles Clustering with Trajectory Inference through a Topology  
1014 Preserving Map of Single Cells.” *Genome Biology* 20 (1): 59.  
1015 <https://doi.org/10.1186/s13059-019-1663-x>.
- 1016 Yi, Nengjun, Zaixiang Tang, Xinyan Zhang, and Boyi Guo. 2019. “BhGLM: Bayesian Hierarchical  
1017 GLMs and Survival Models, with Applications to Genomics and Epidemiology.”  
1018 *Bioinformatics* 35 (8): 1419–21. <https://doi.org/10.1093/bioinformatics/bty803>.
- 1019 Yoshihara, Eiji, Carolyn O’Connor, Emanuel Gasser, Zong Wei, Tae Gyu Oh, Tiffany W. Tseng,  
1020 Dan Wang, et al. 2020. “Immune-Evasive Human Islet-like Organoids Ameliorate  
1021 Diabetes.” *Nature* 586 (7830): 606–11. <https://doi.org/10.1038/s41586-020-2631-z>.  
1022  
1023

## 1024 **Acknowledgements**

1025 This research was performed with the support of the Network for Pancreatic Organ donors with  
1026 Diabetes (nPOD; RRID:SCR\_014641), a collaborative type 1 diabetes research project supported  
1027 by JDRF (nPOD: 5-SRA-2018-557-Q-R) and The Leona M. & Harry B. Helmsley Charitable Trust  
1028 (Grant#2018PG-T1D053, G-2108-04793). The content and views expressed are the responsibility  
1029 of the authors and do not necessarily reflect the official view of nPOD. Organ Procurement  
1030 Organizations (OPO) partnering with nPOD to provide research resources are listed  
1031 at <http://www.jdrfnpod.org/for-partners/npod-partners/>. Research reported in this publication  
1032 was supported by the National Cancer Institute and National Institute of Allergy and Infectious  
1033 Diseases of the National Institutes of Health under Award Numbers K99CA246061,  
1034 5U54CA209971-05, 5U2CCA233195-02, 1U2CCA233238-01, 5U2CCA233195-02, 5U01AI101984-09. The  
1035 content is solely the responsibility of the authors and does not necessarily represent the official  
1036 views of the National Institutes of Health. C.M.S. was supported by the Swiss National Science  
1037 Foundation (P300PB\_171189, P400PM\_183915). We like to thank Yury Goltsev, Pauline Chu,  
1038 Sarah Black, Gustavo Vazquez, Aviv Hargil (Stanford University), and Irina Kusmartseva (nPOD)  
1039 for excellent assistance. We like to thank Dr. Xavier Rovira-Clavé (Stanford University) for critical  
1040 comments on the manuscript.

## 1041 **Author information**

1042 G.L.B curated data, wrote software, and analyzed data. D.P. and C.M.S contributed significantly  
1043 to validating the antibody panel and assisted with analysis. S.D., S.S.B, A.Y., H.A.M., G.K.K., N.N.,  
1044 S.R., and J.M. assisted with analysis. G.L.B., J.A.B., G.P.N., and P.L.B., conceptualized the study  
1045 and wrote the manuscript. All authors have read and approved the final version of the  
1046 manuscript.

## 1047 **Ethics declarations**

1048 P.L.B.: Founder, Halo Biosciences.

1049 N.N.: Founder, Halo Biosciences.

1050 PLB, NN and GK have filed intellectual property around 4-MU. PLB, NN and GK hold a financial  
1051 interest in Halo Biosciences, a company that is developing 4-MU for various indications.

1052 G.P.N. has received research grants from Vaxart and Celgene during the course of this work and  
1053 has equity in and is a scientific advisory board member of Akoya Biosciences. Akoya Biosciences  
1054 makes reagents and instruments that are dependent on licenses from Stanford University.  
1055 Stanford University has been granted US patent 9909167, which covers some aspects of the  
1056 technology described in this paper.

1057 J.A.B.: Board of director for Gilead and CEO and President of Sonoma Biotherapeutics; scientific  
1058 advisory boards of Arcus Biotherapeutics and Cimeio Therapeutics; consultant for Rheos  
1059 Medicines, Provention Bio; stockholder in Rheos Medicines, Vir Therapeutics, Arcus  
1060 Biotherapeutics, Solid Biosciences, Celsius Therapeutics; Gilead Sciences, Provention Bio,  
1061 Sonoma Biotherapeutics.

1062 C.M.S.: Scientific advisory board of, stock options in, research funding from Enable Medicine, Inc.
